# Supplementary material
Source: PubMed Central journal article supplement (PMC5095398)

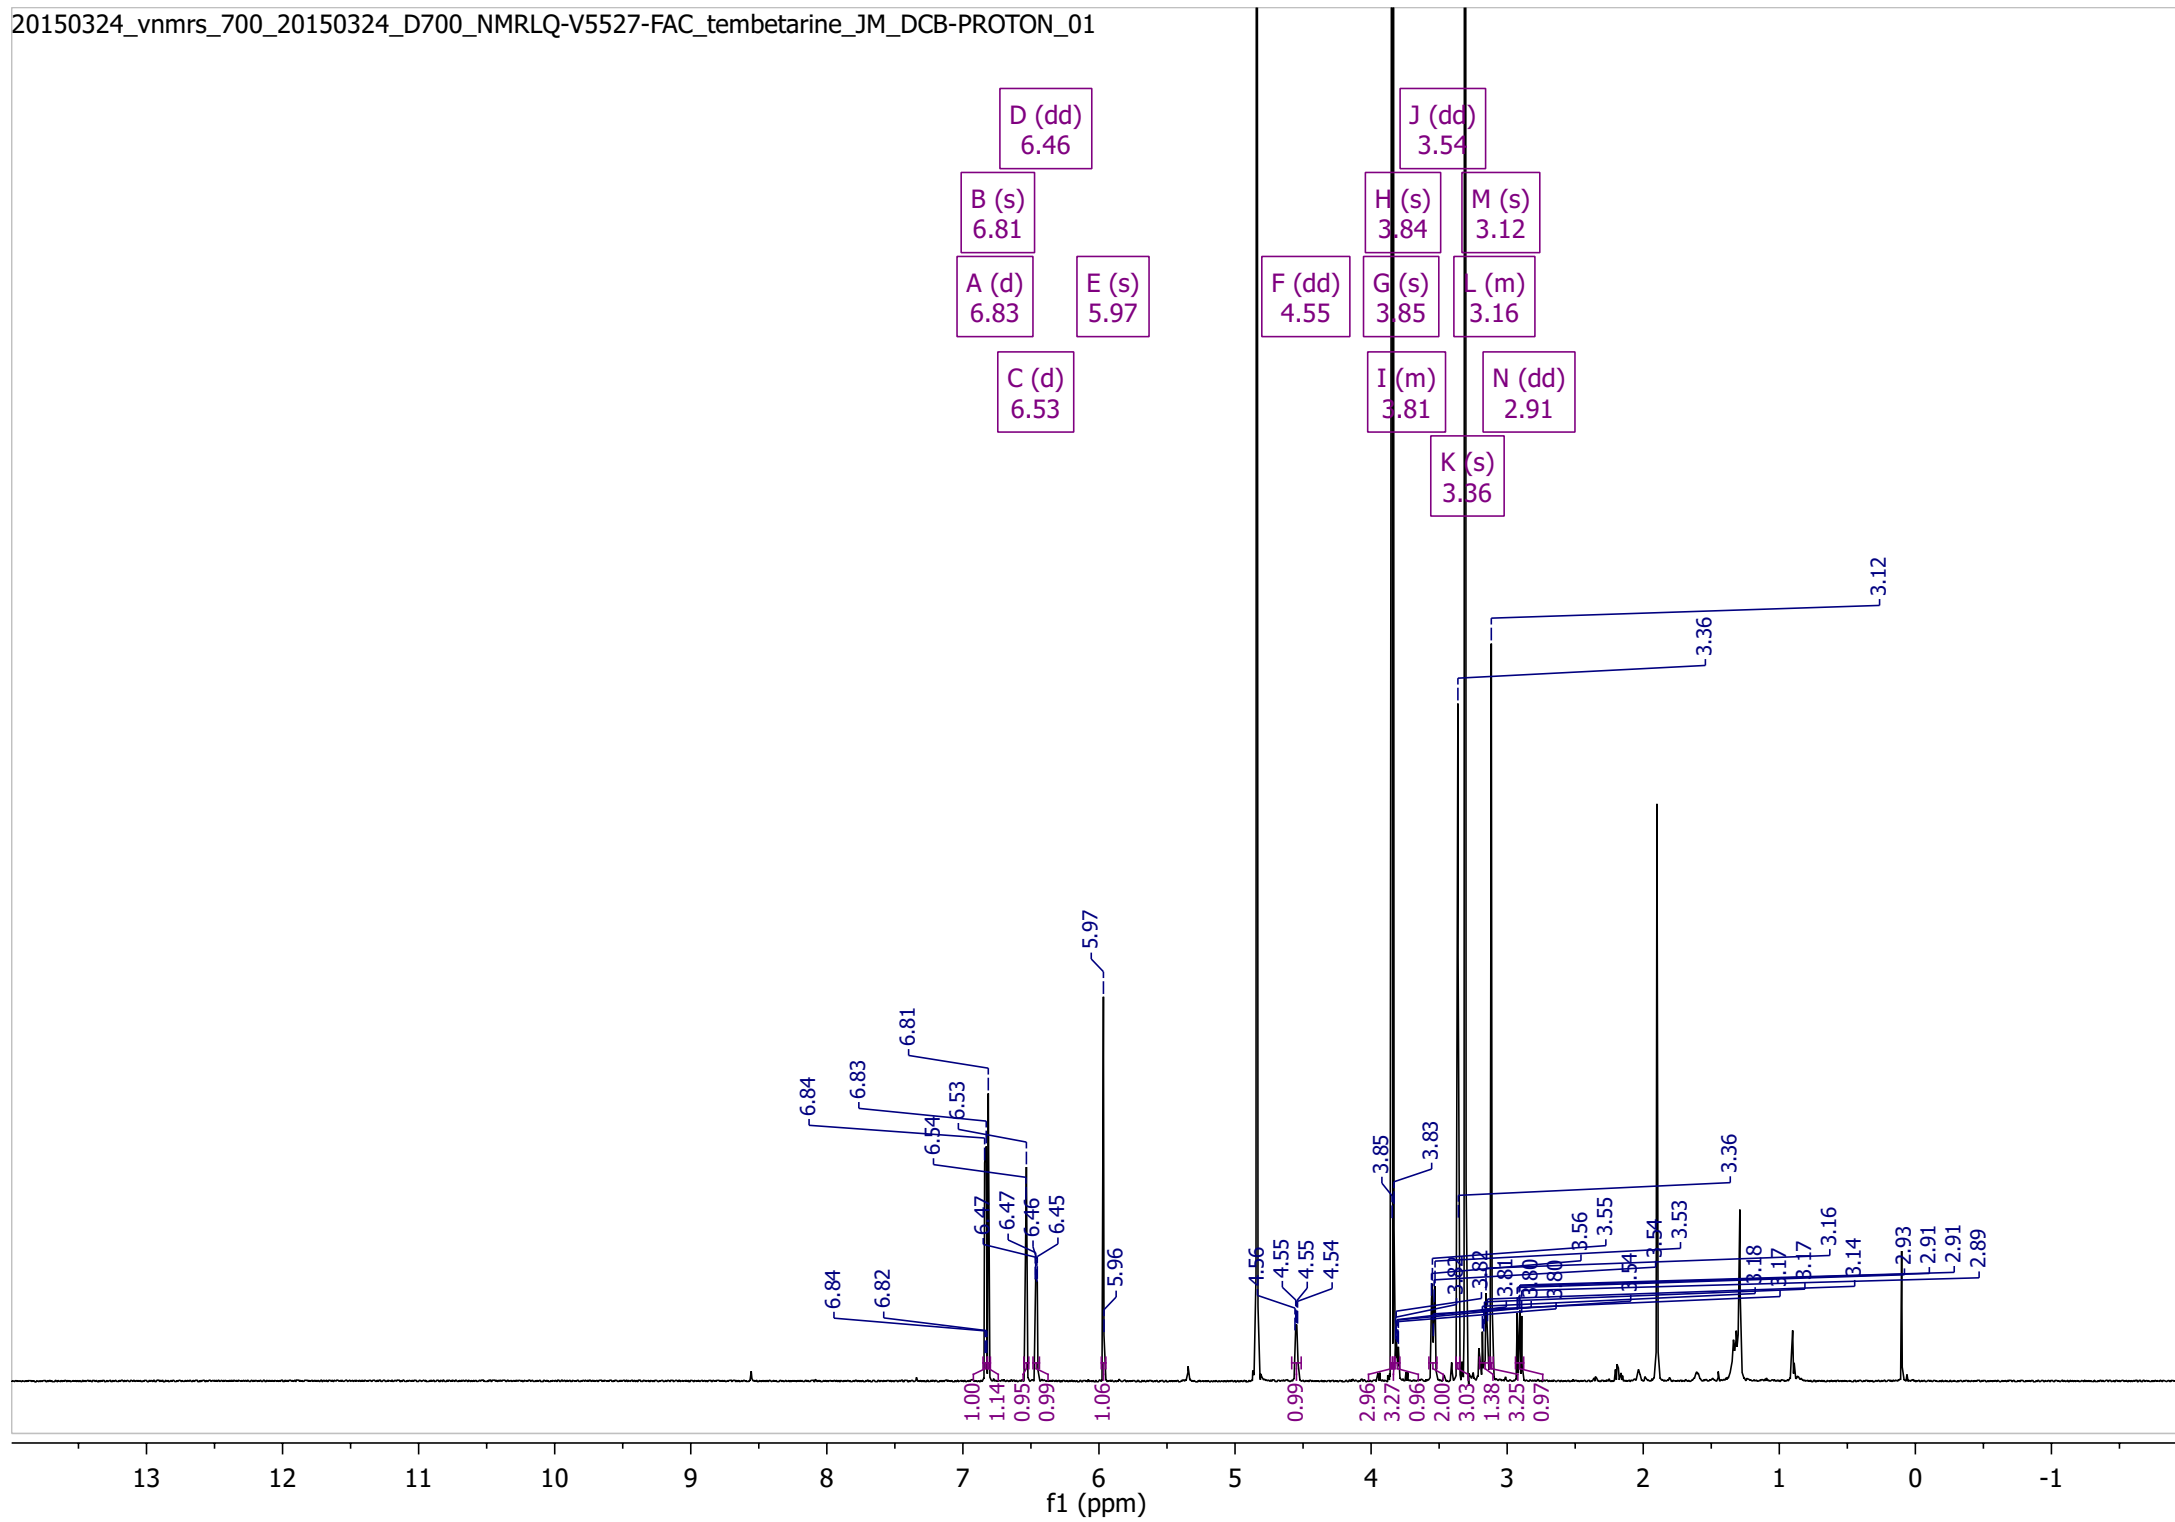

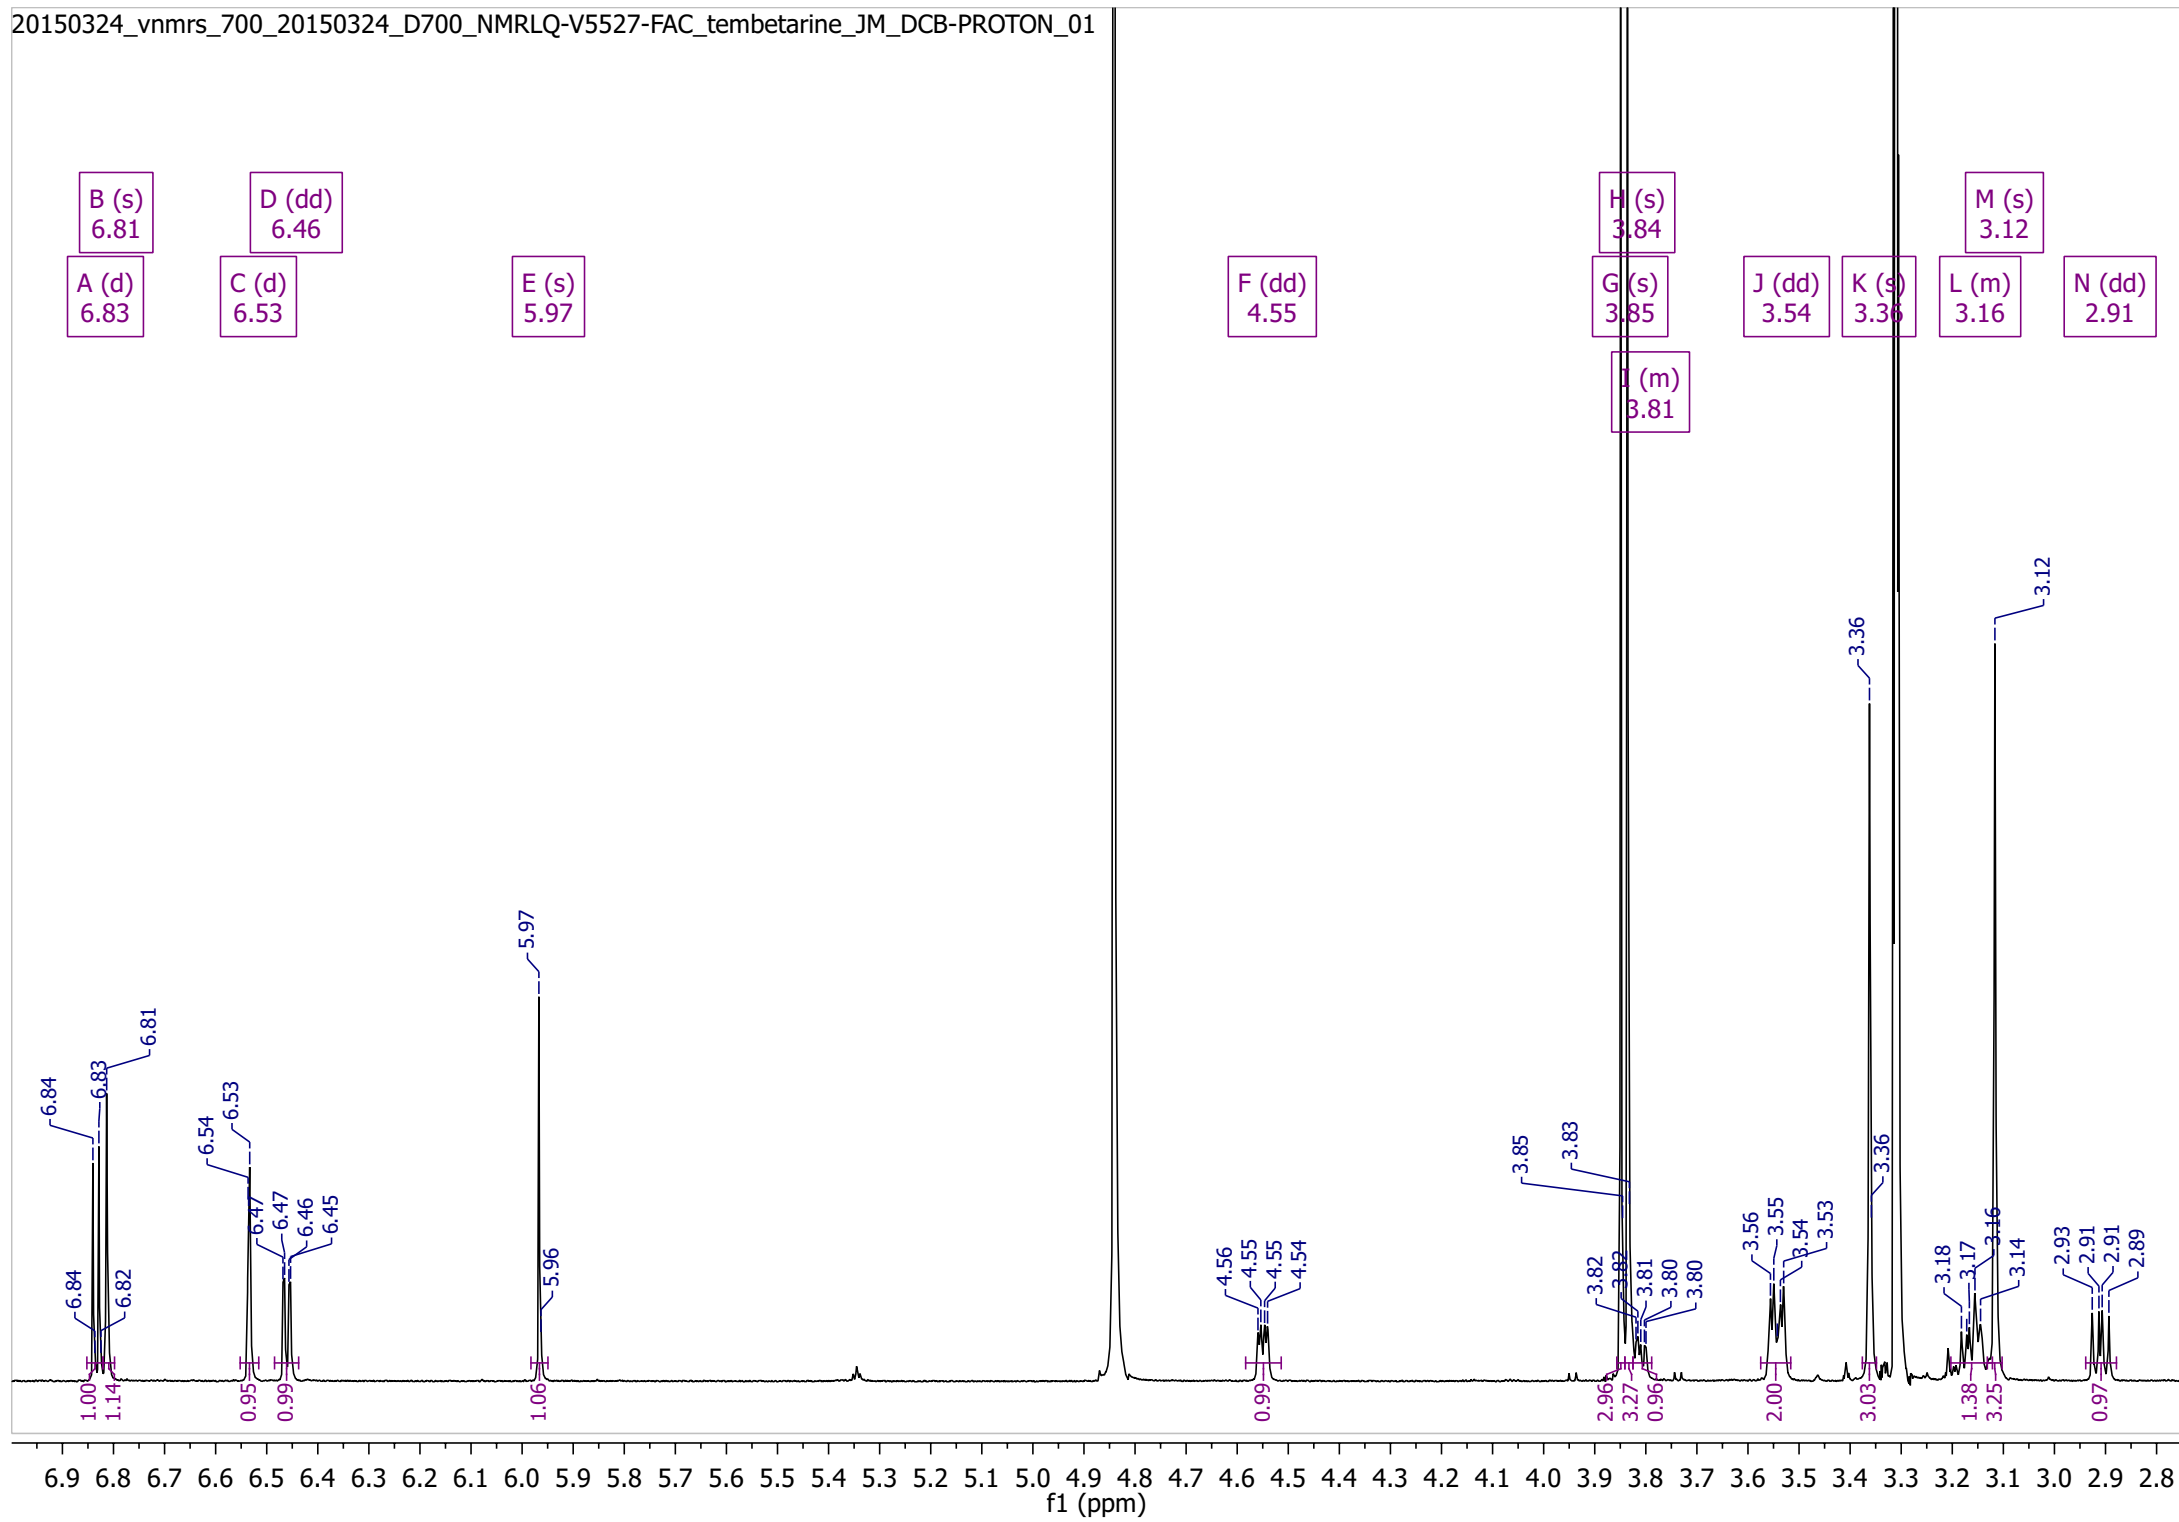

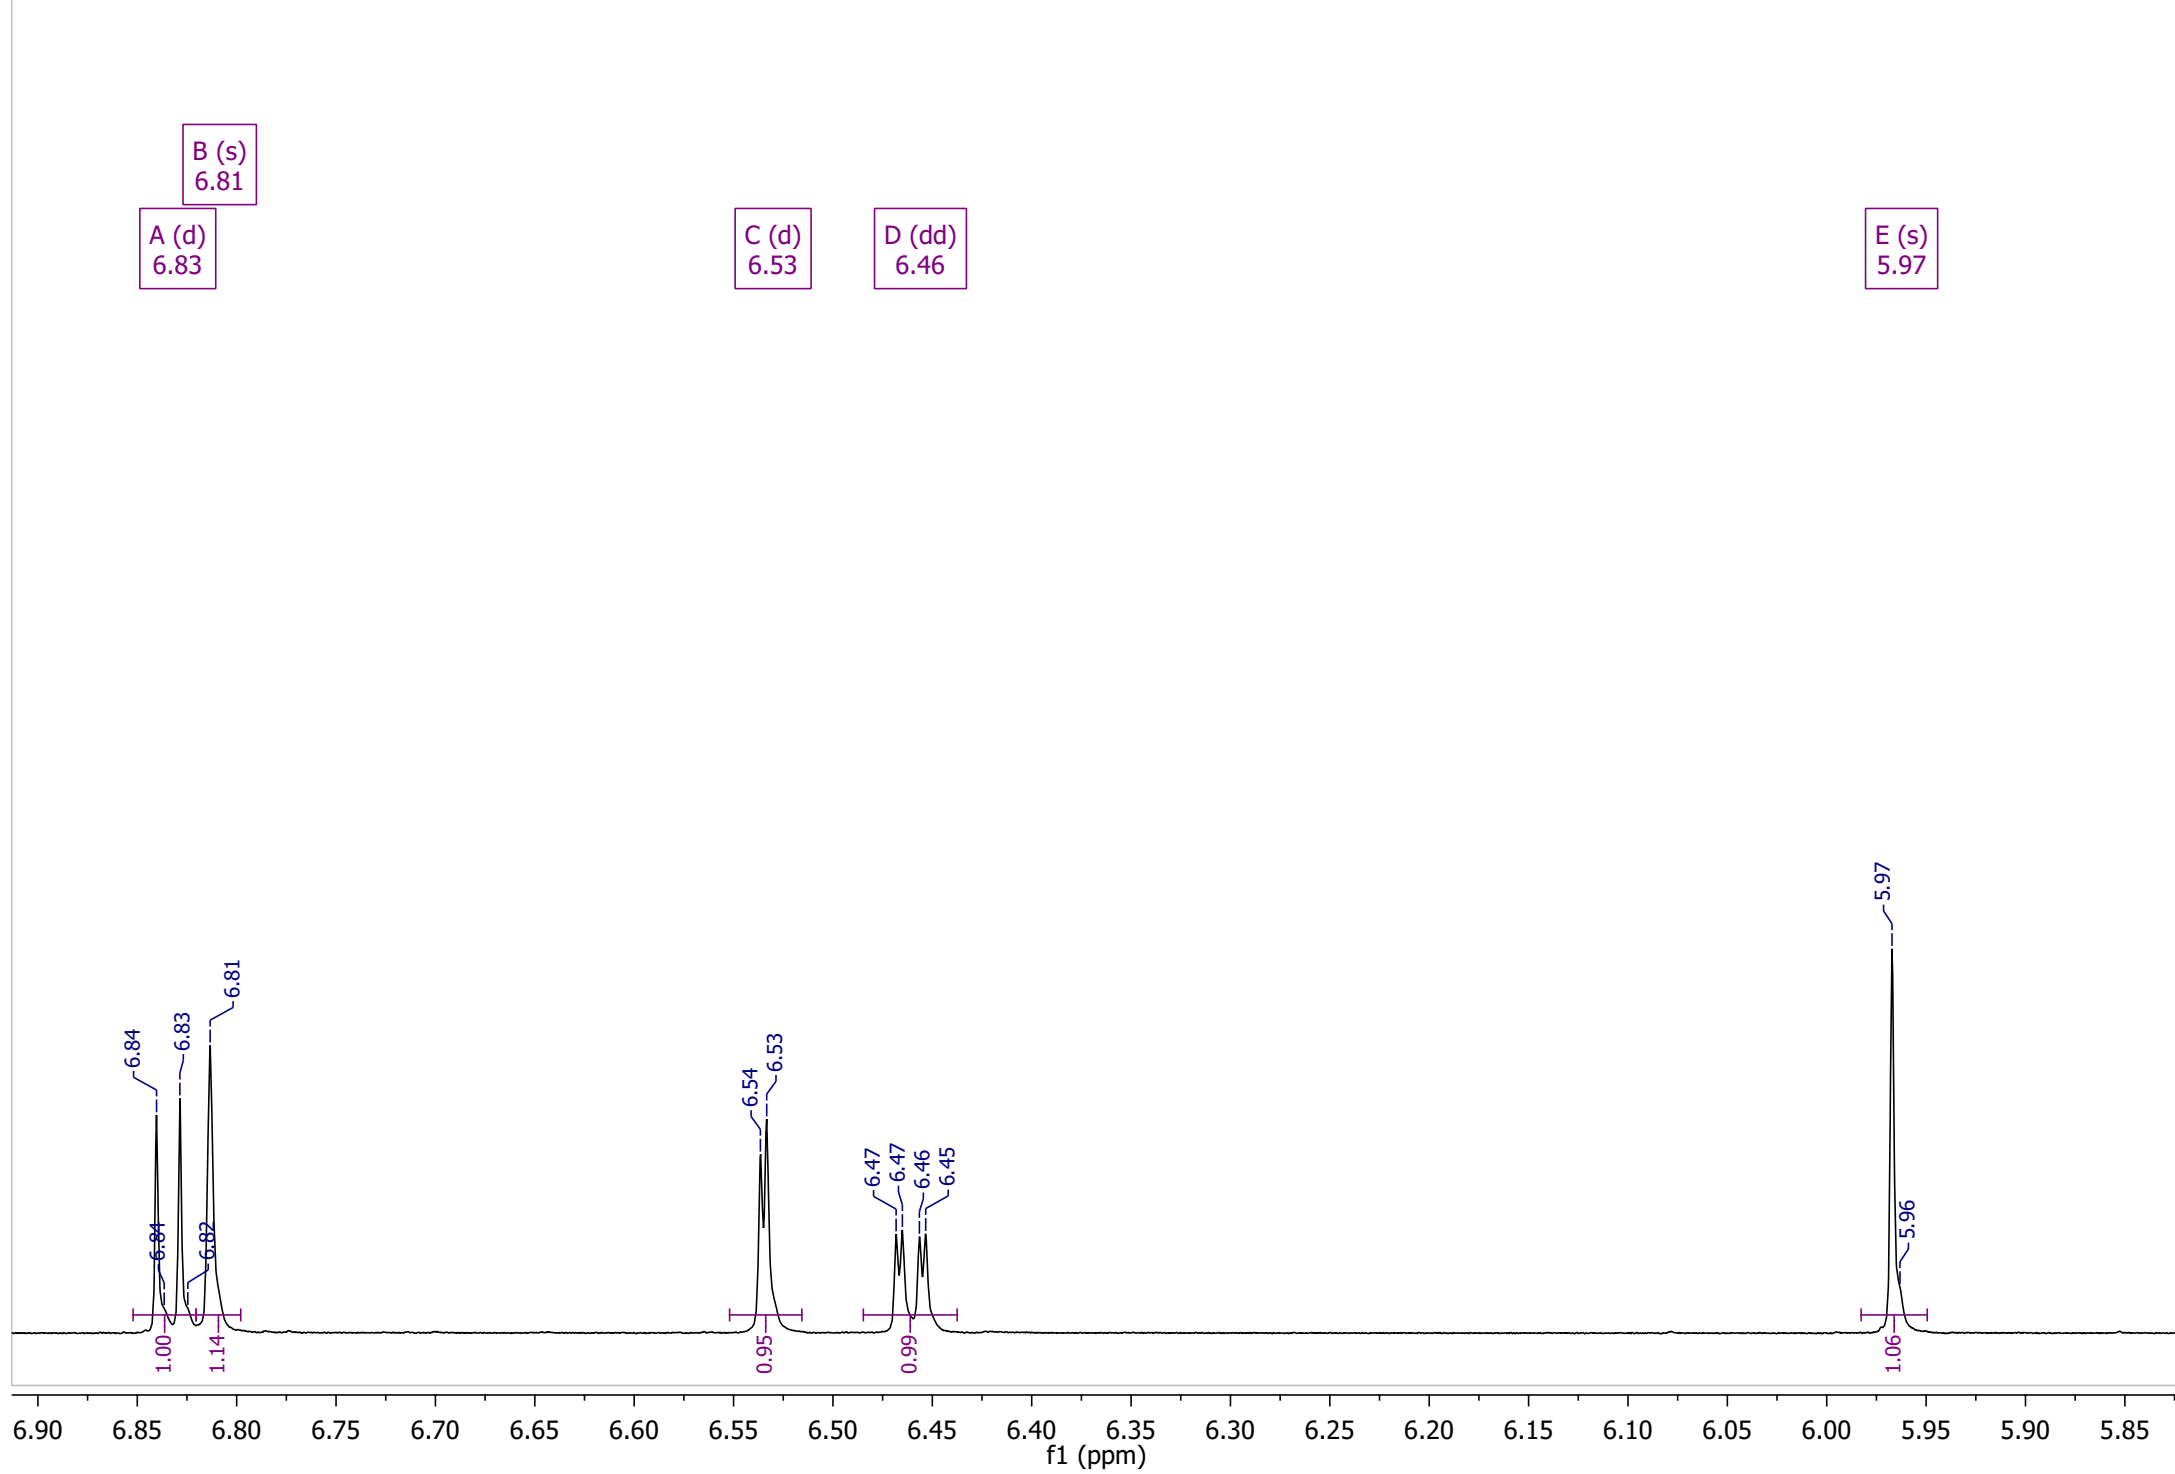

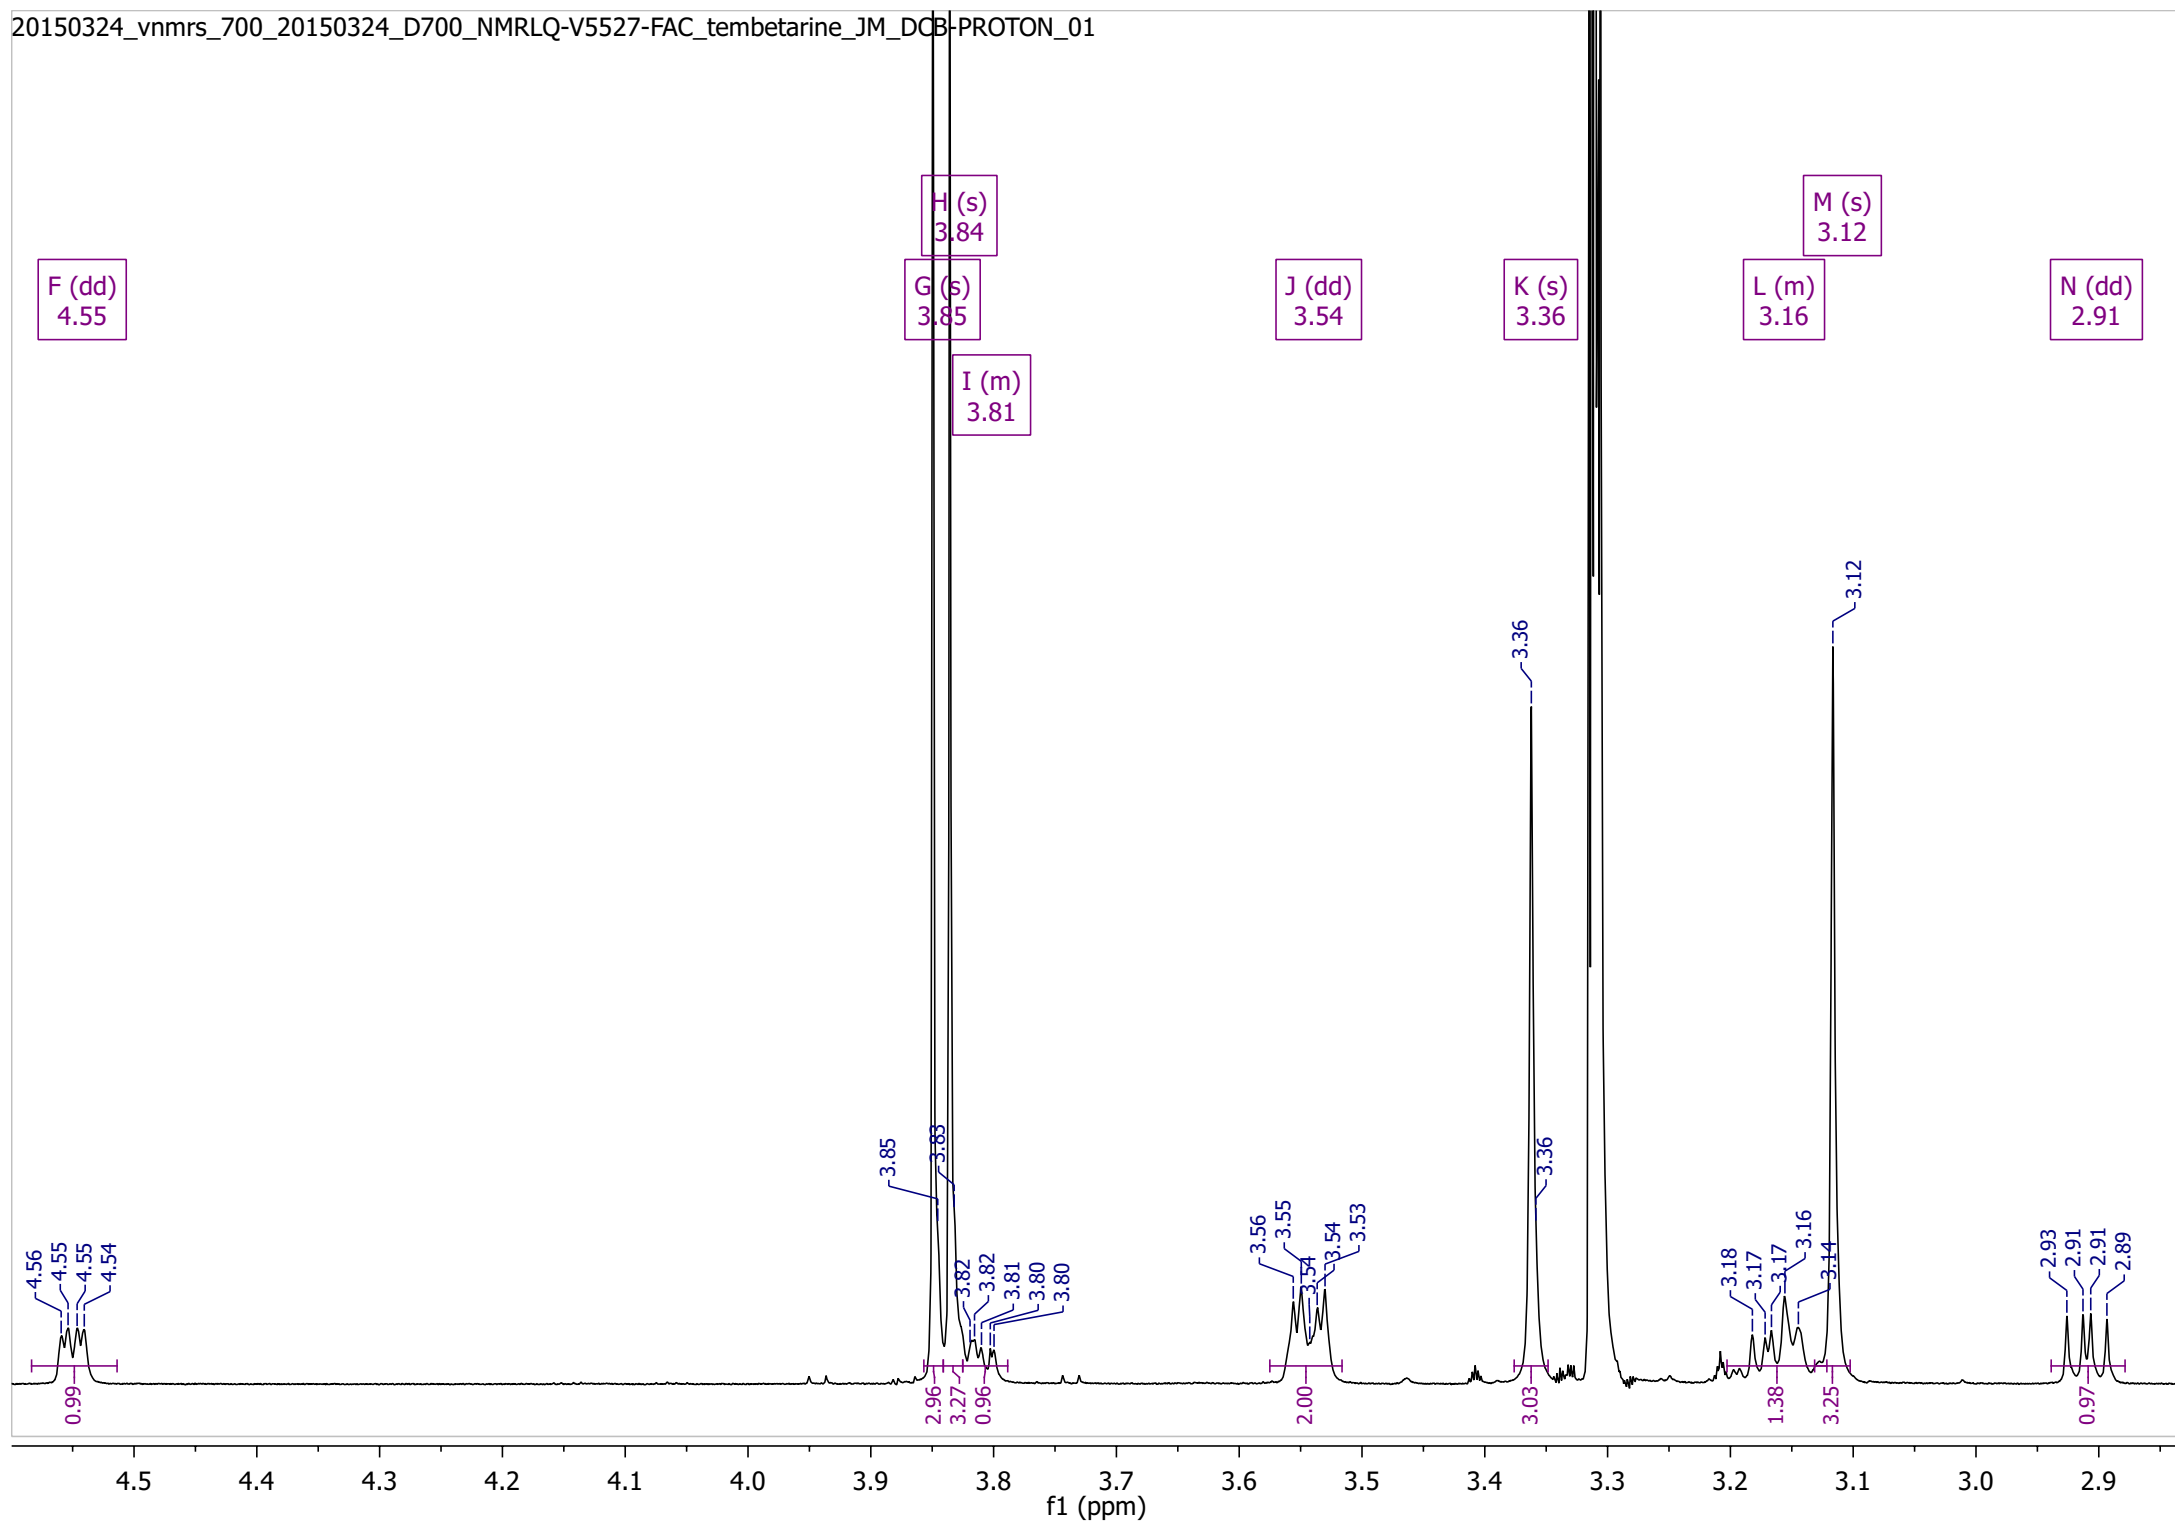

20150324\_vnmrs\_700\_20150324\_D700\_NMRLQ-V5527-FAC\_tembetarine\_JM\_DCB-gCOSY\_01

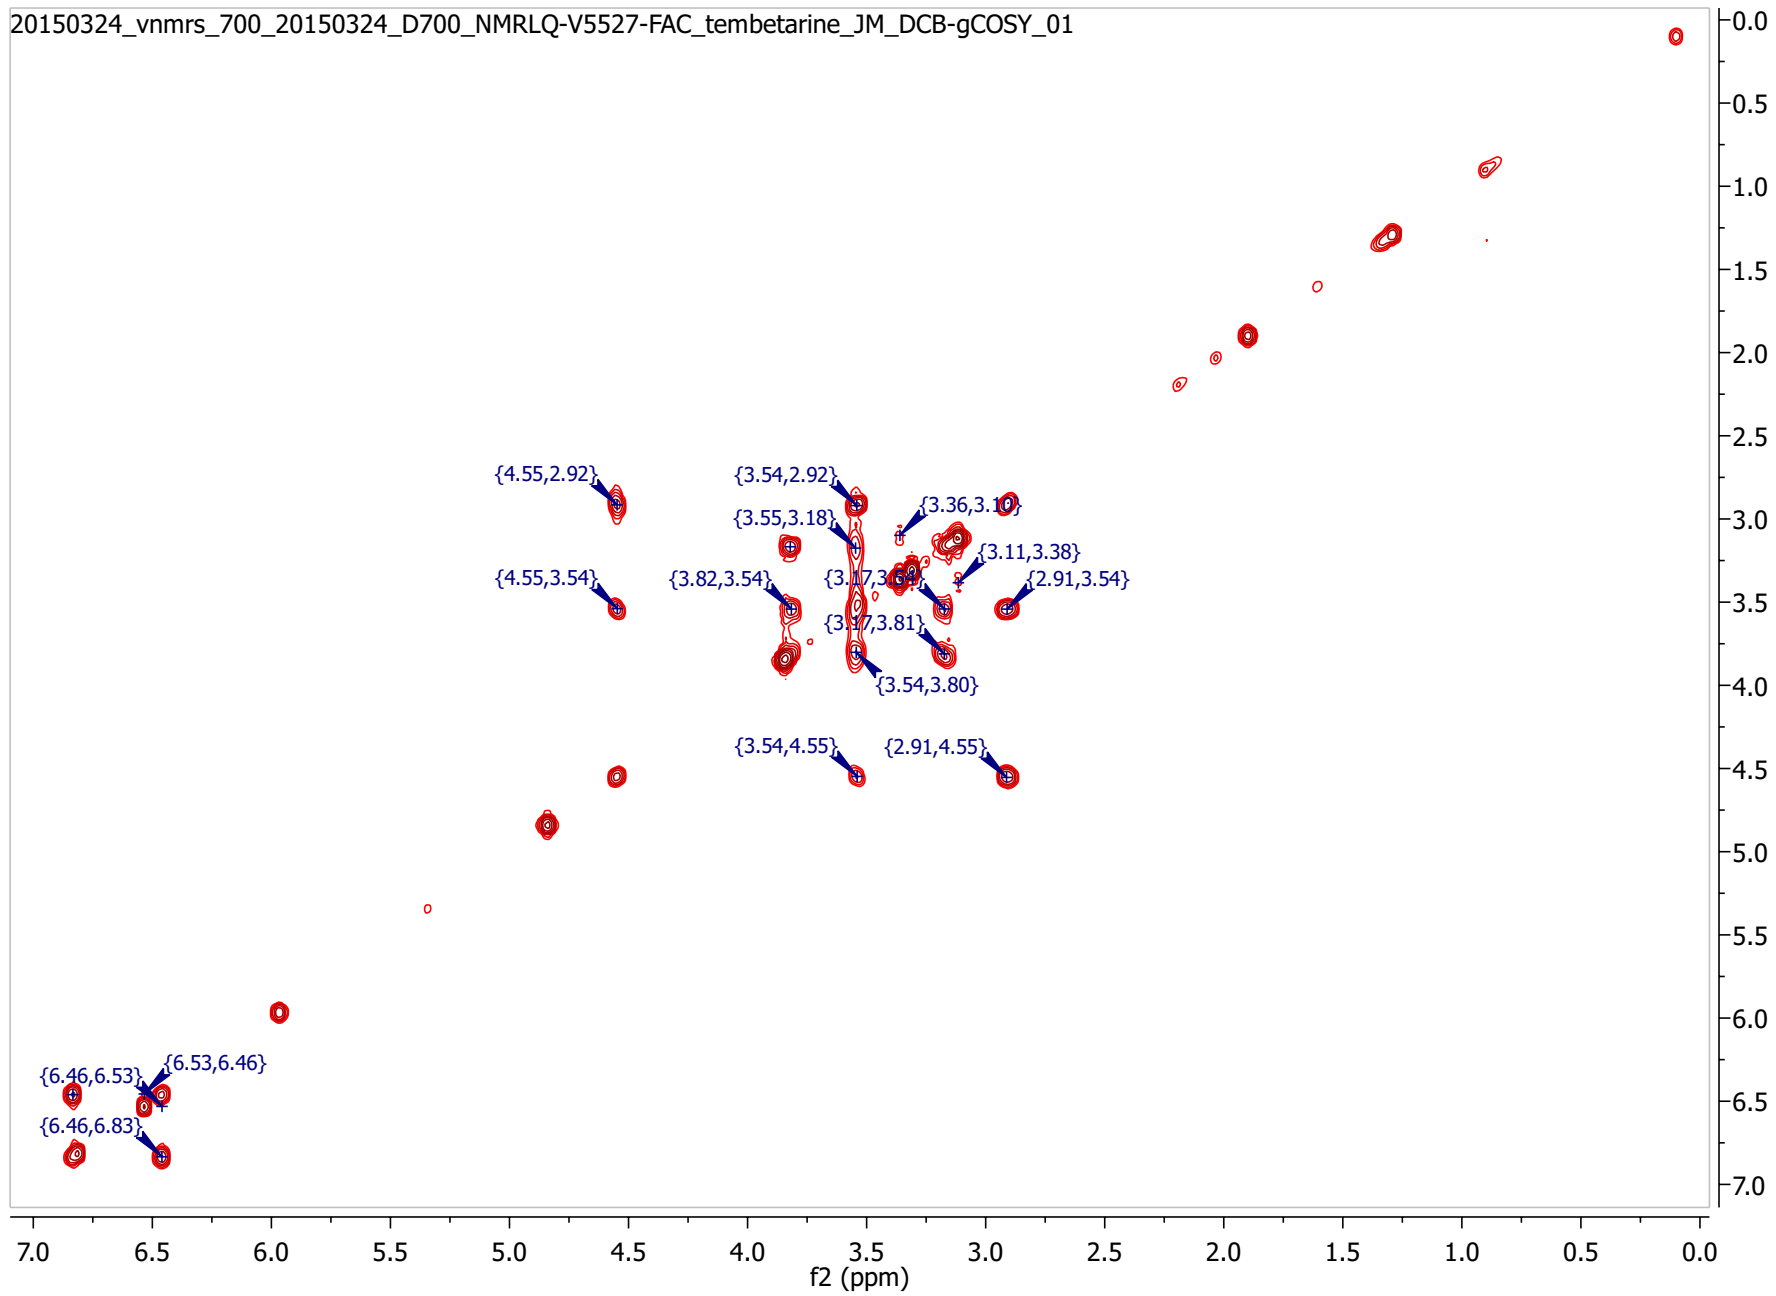

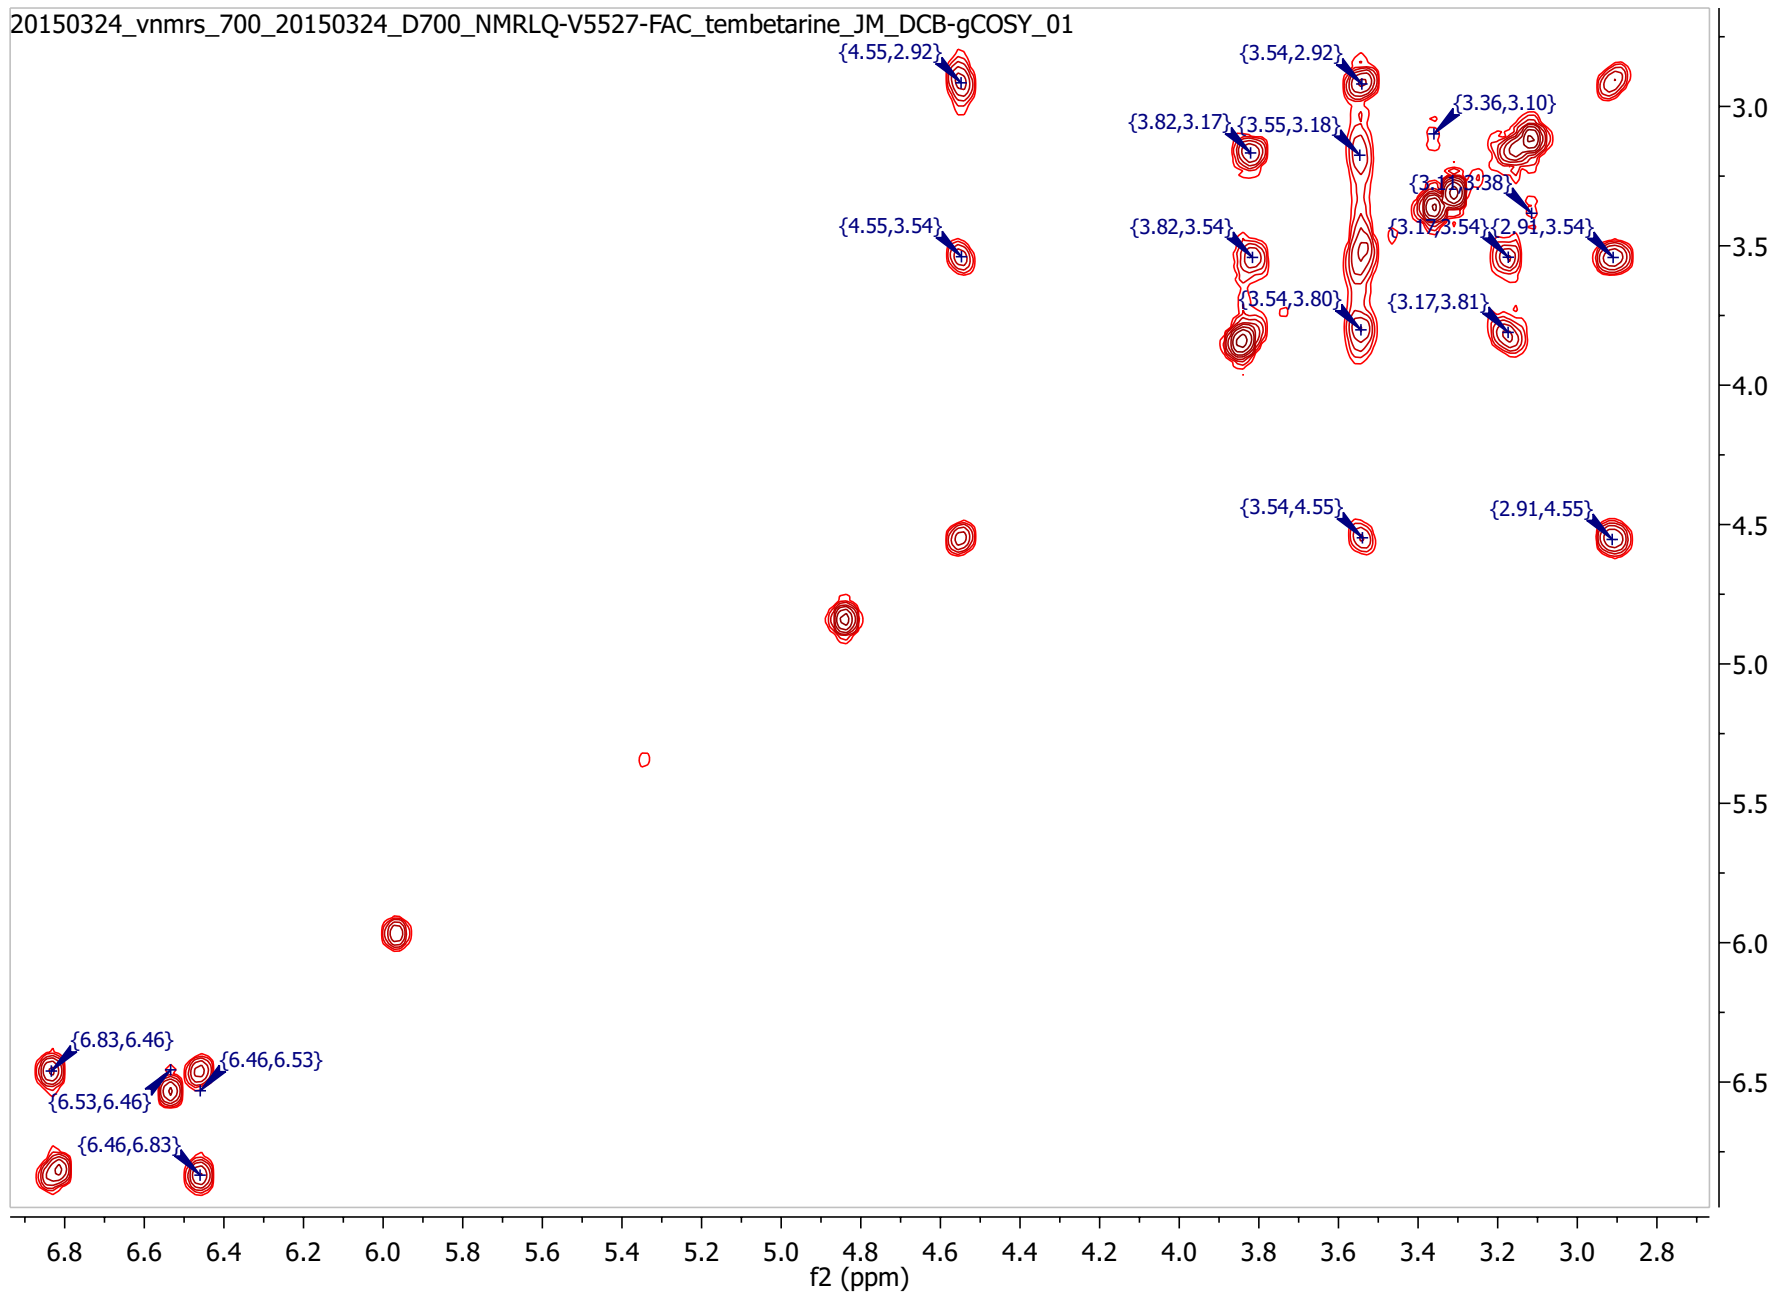

20150324\_vnmrs\_700\_20150324\_D700\_NMRLQ-V5527-FAC\_tembetarine\_JM\_DCB-gc2hsqcse\_01

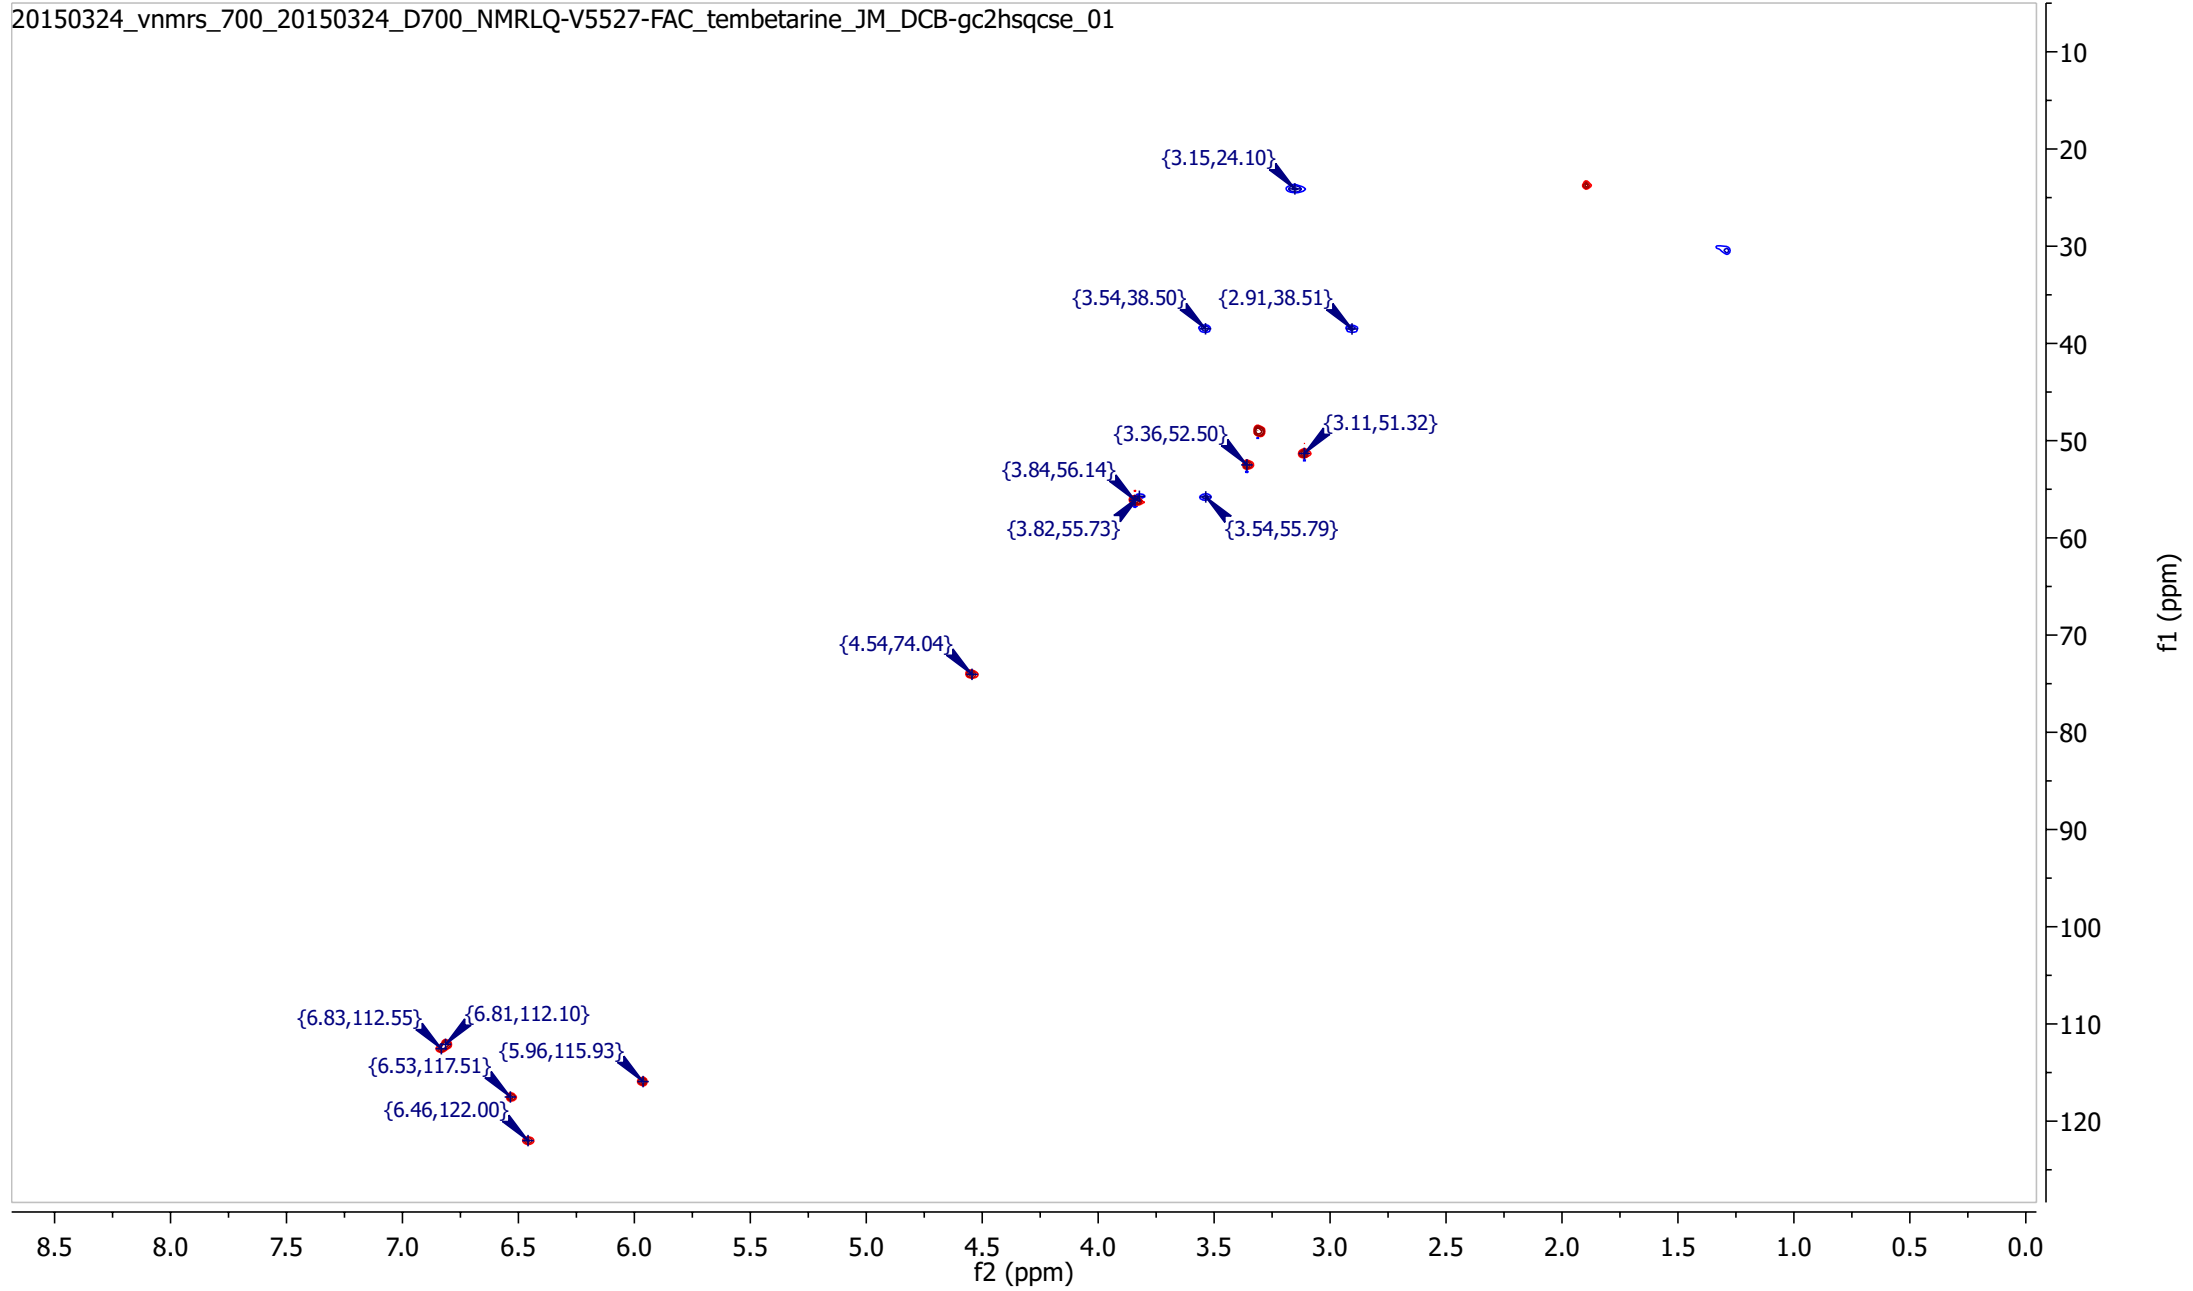

20150324\_vnmrs\_700\_20150324\_D700\_NMRLQ-V5527-FAC\_tembetarine\_JM\_DCB-gc2hsqcse\_01

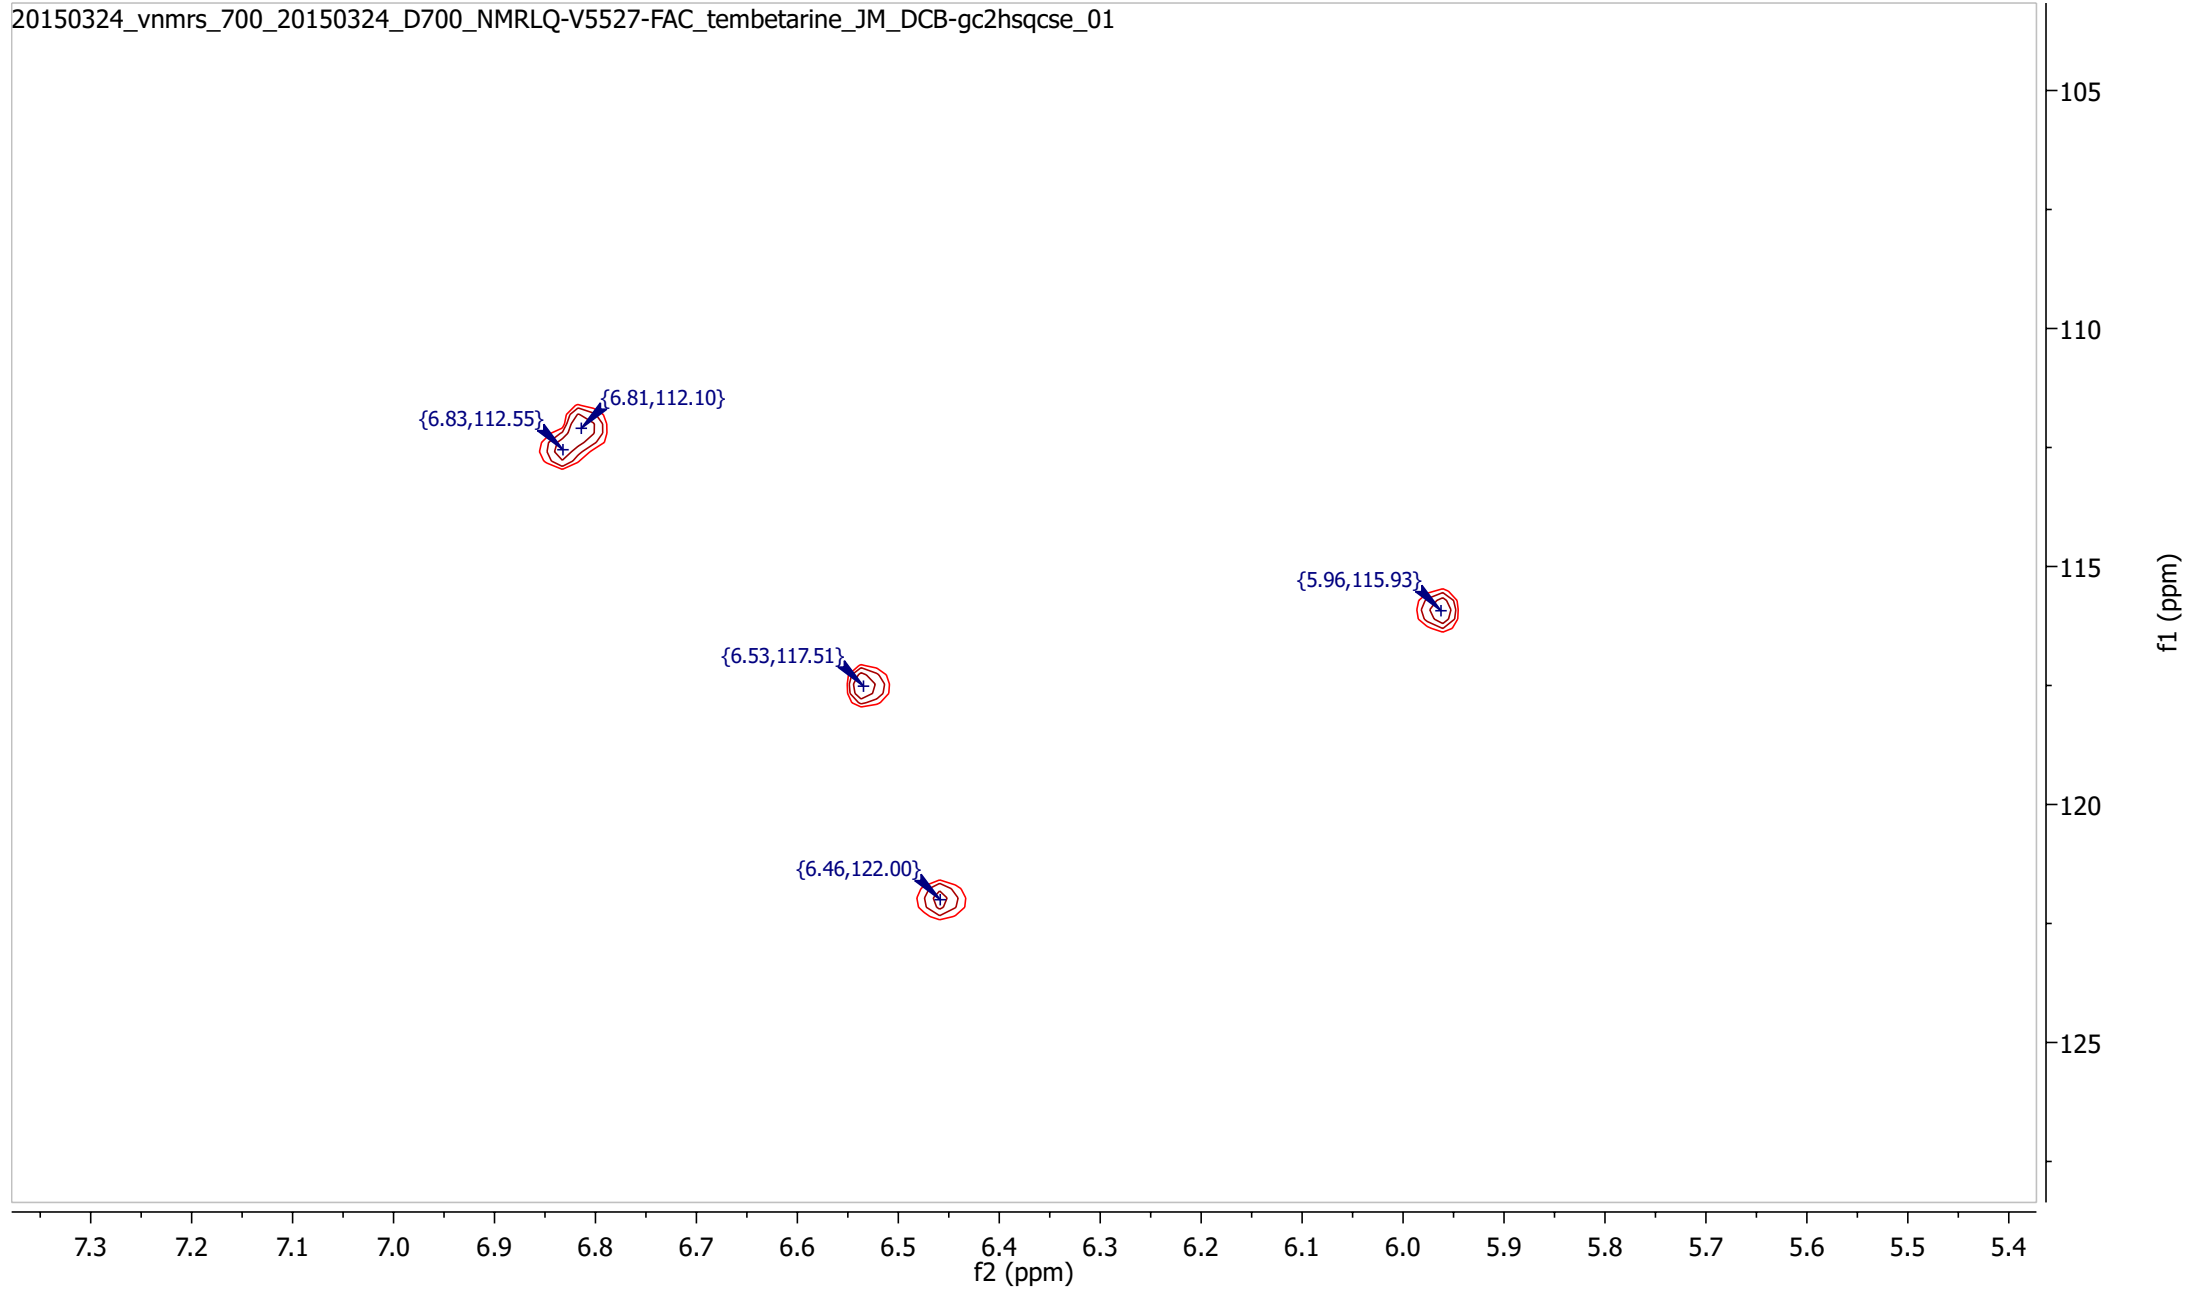



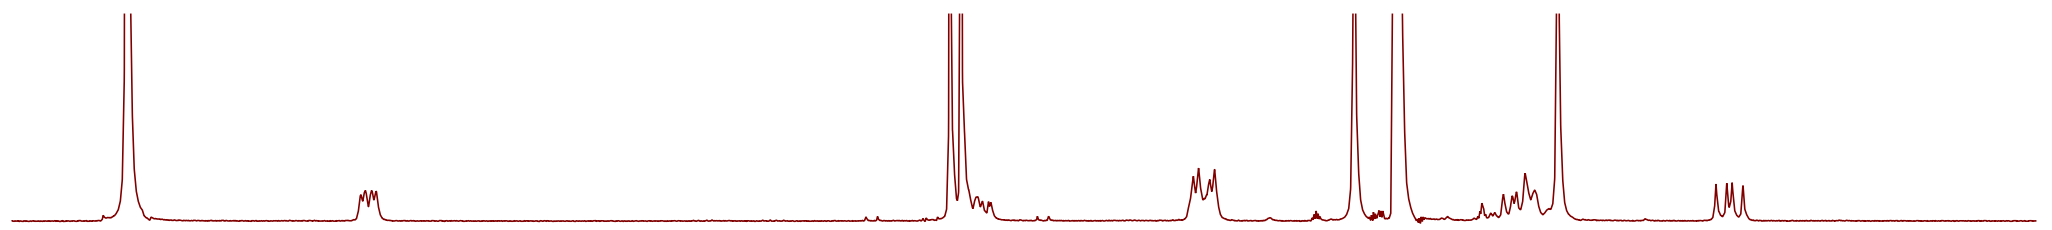

20150324\_vnmrs\_700\_20150324\_D700\_NMRLQ-V5527-FAC\_tembetarine\_JM\_DCB-gc2hsqcse\_01

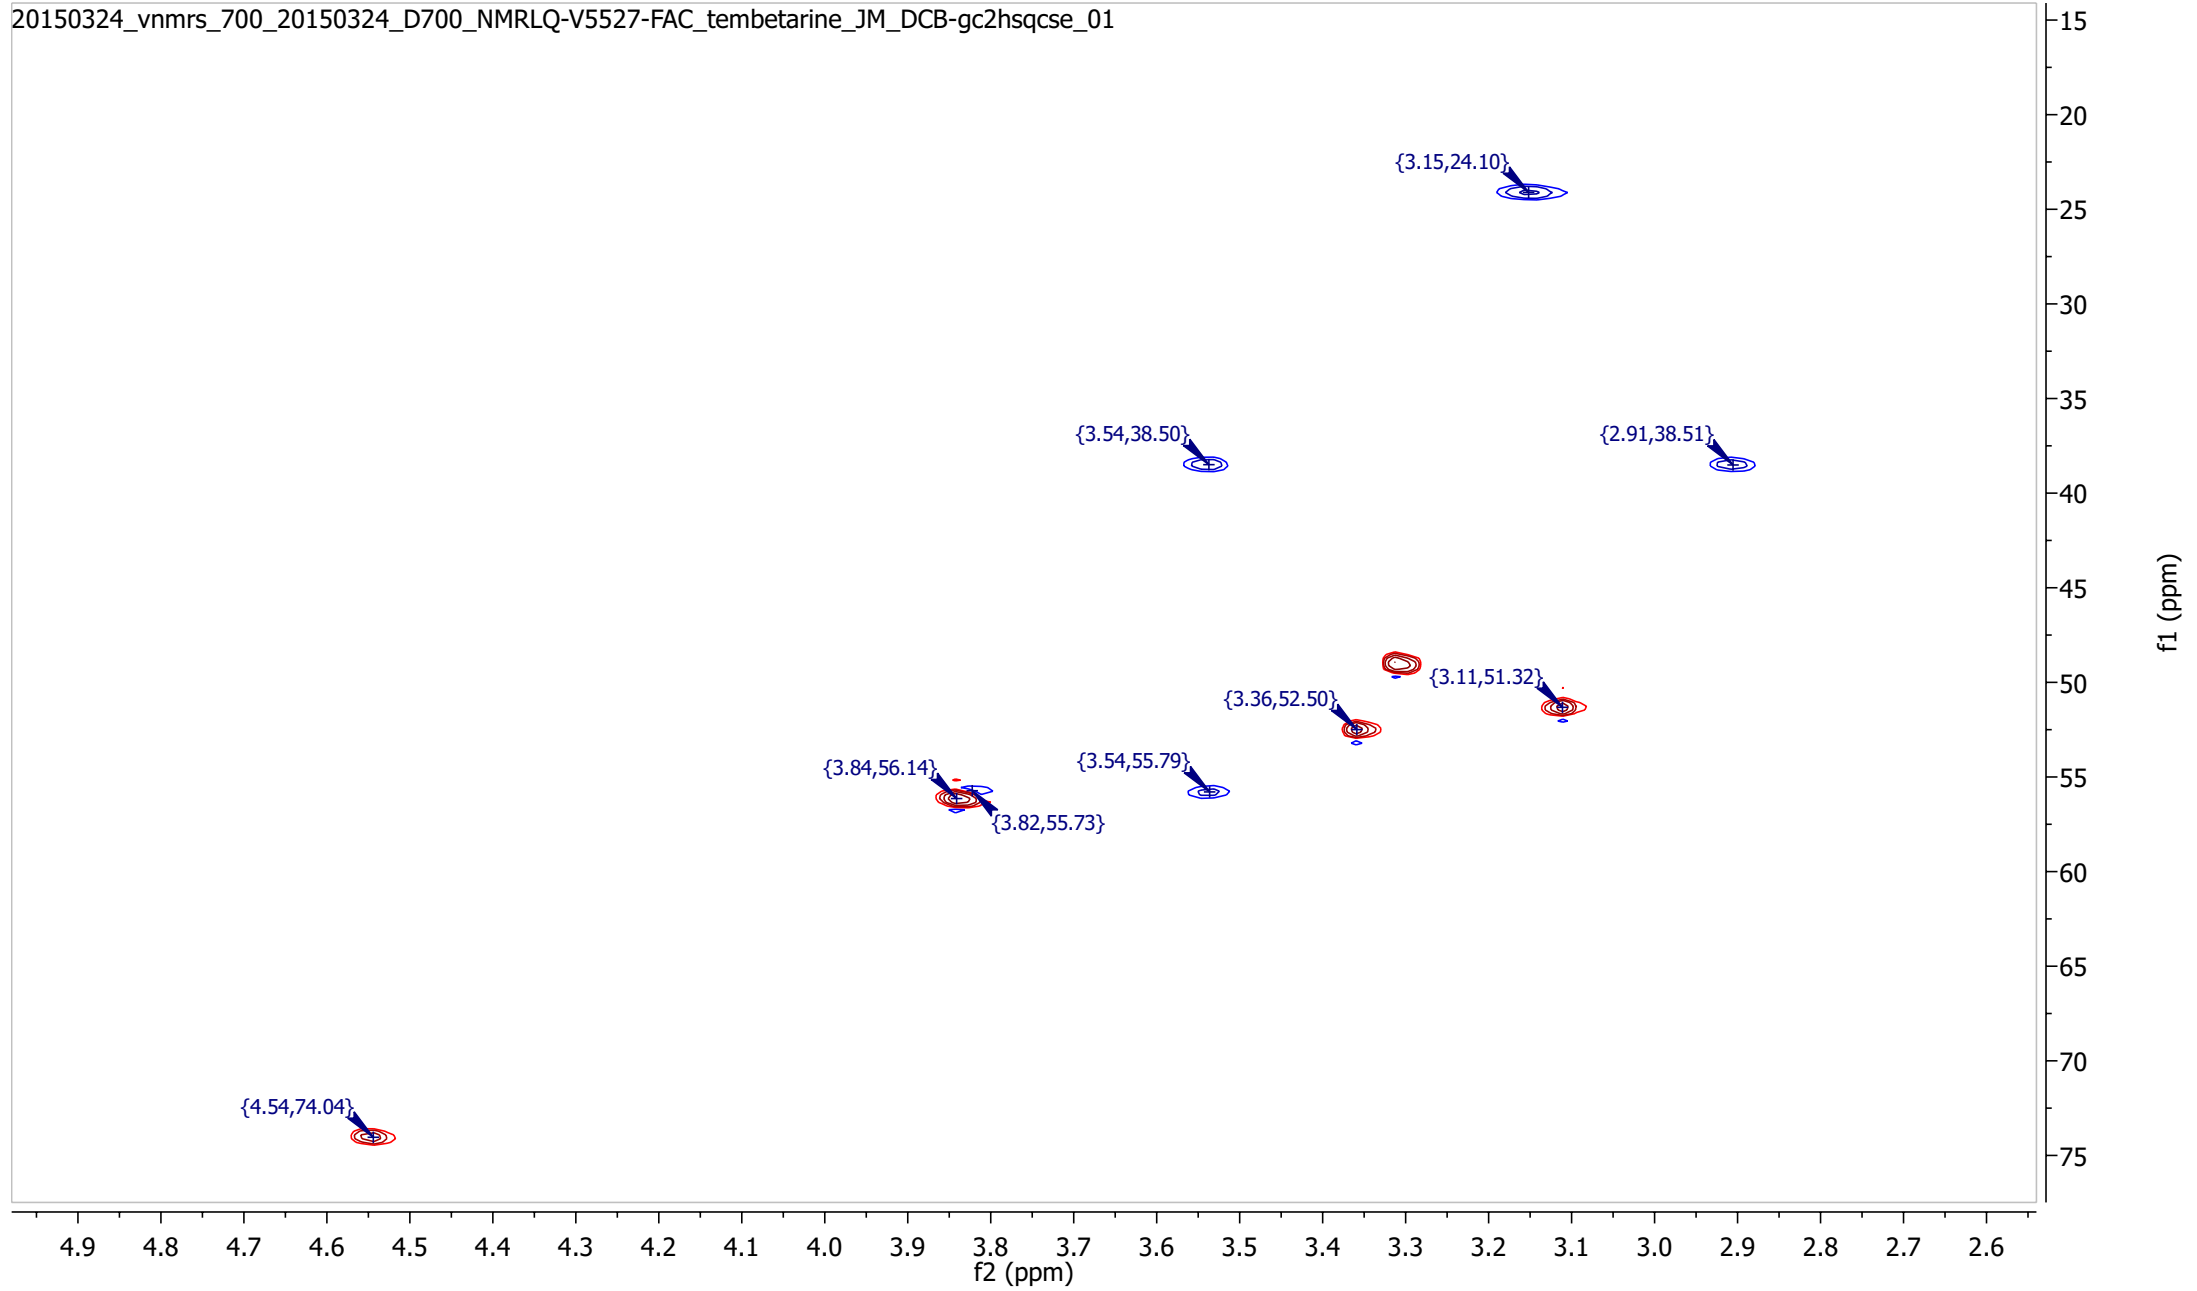

20150324\_vnmrs\_700\_20150324\_D700\_NMRLQ-V5527-FAC\_tembetarine\_JM\_DCB-gHMBCAD\_01

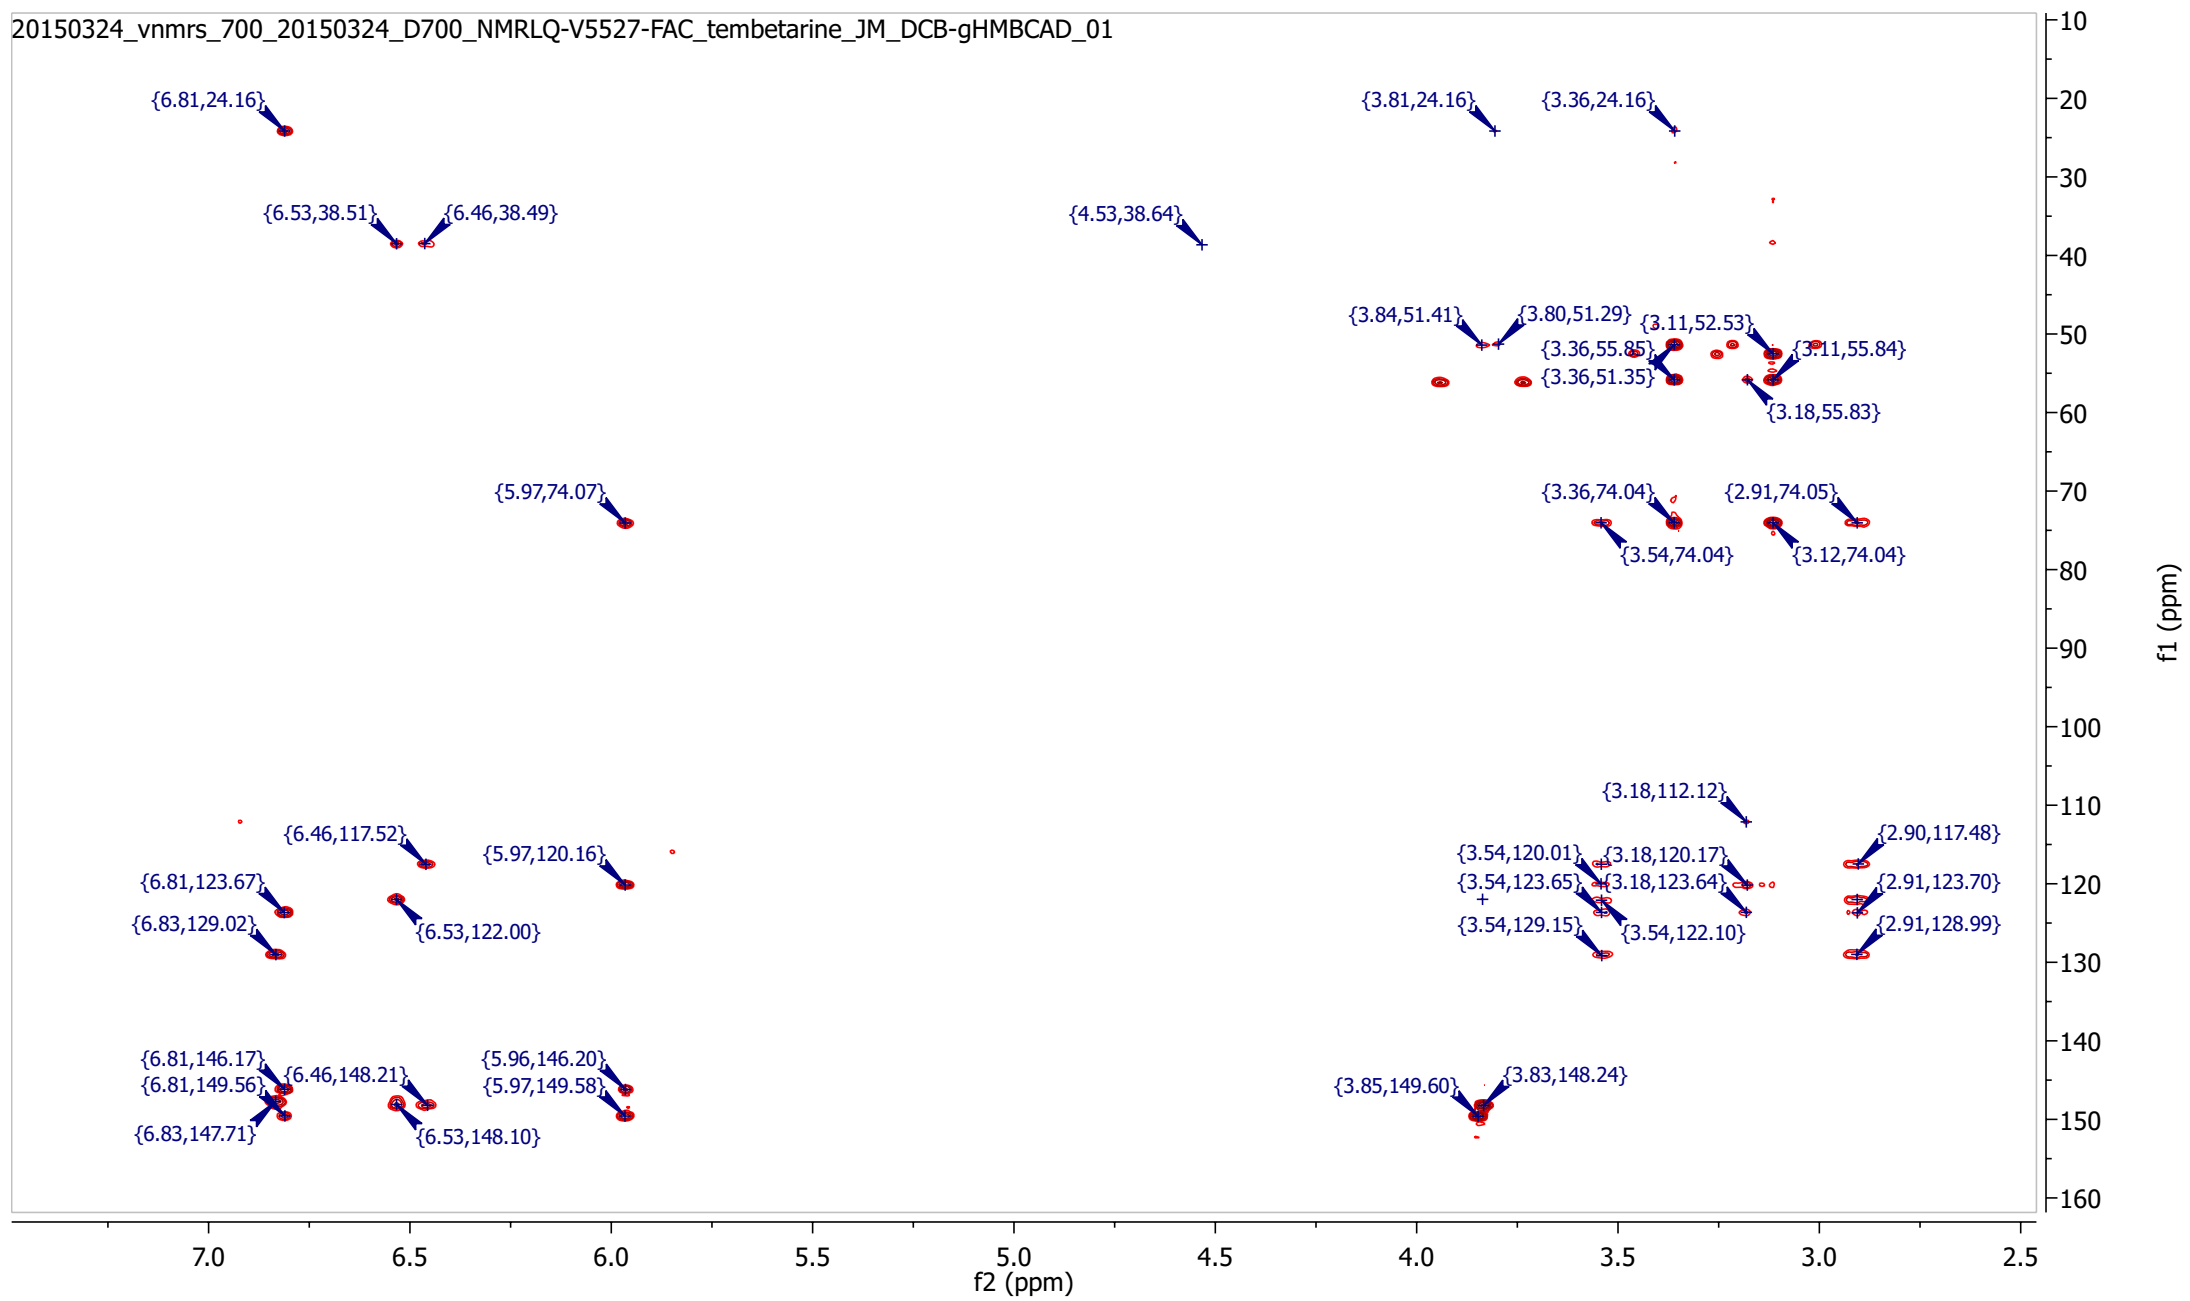

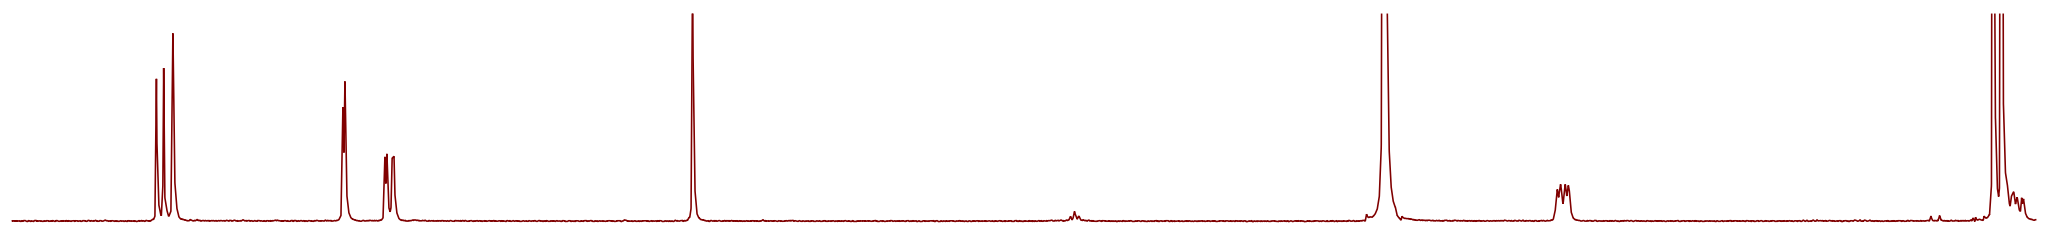

20150324\_vnmrs\_700\_20150324\_D700\_NMRLQ-V5527-FAC\_tembetarine\_JM\_DCB-gHMBCAD\_01

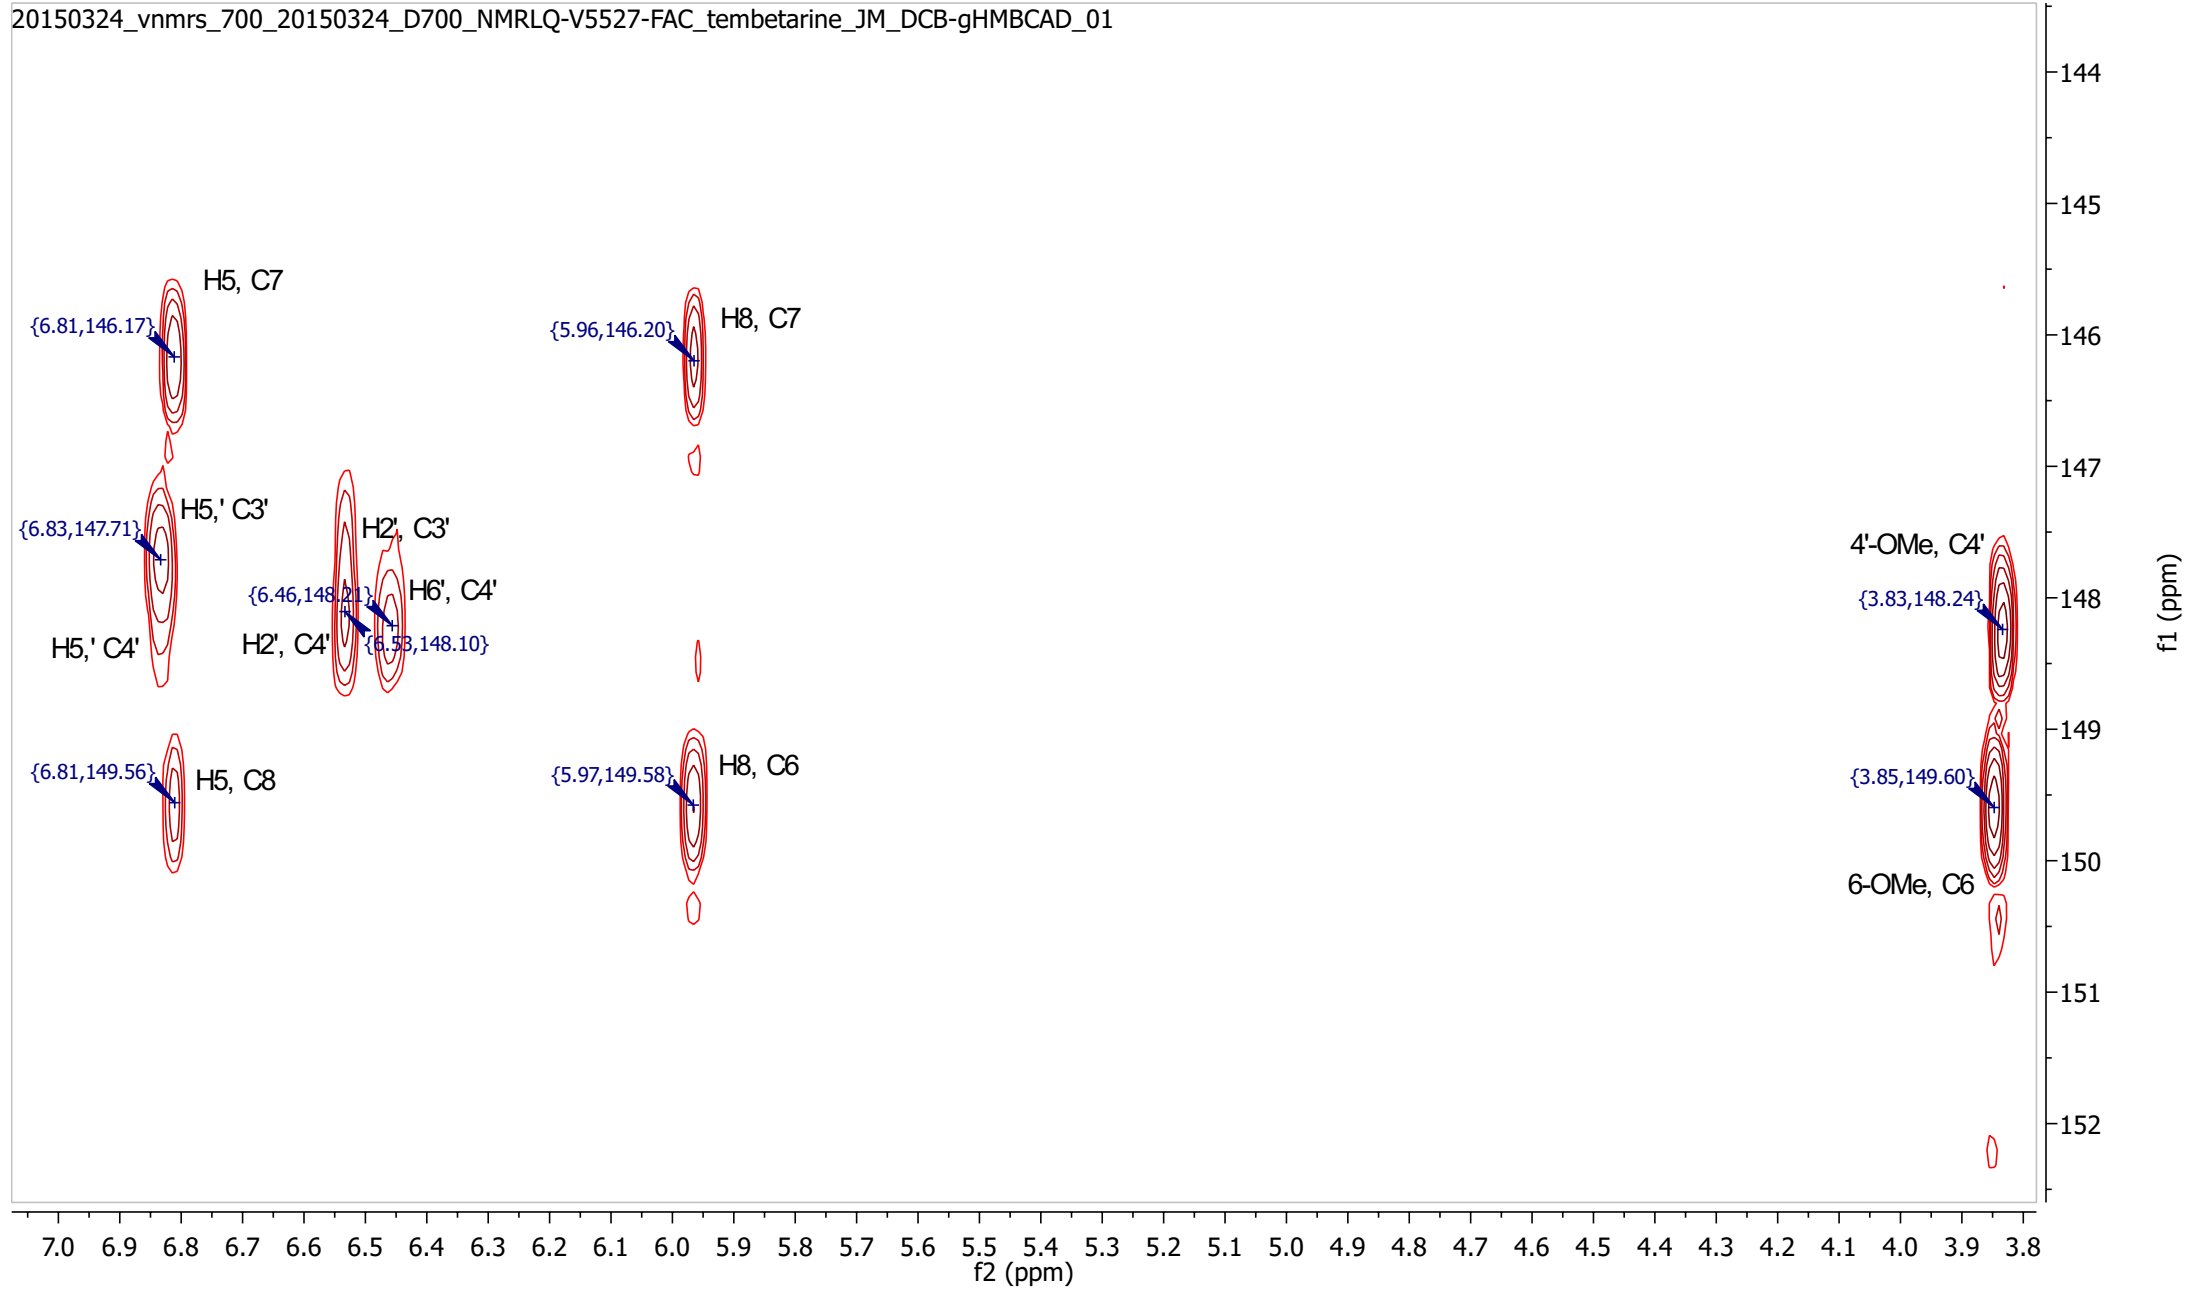

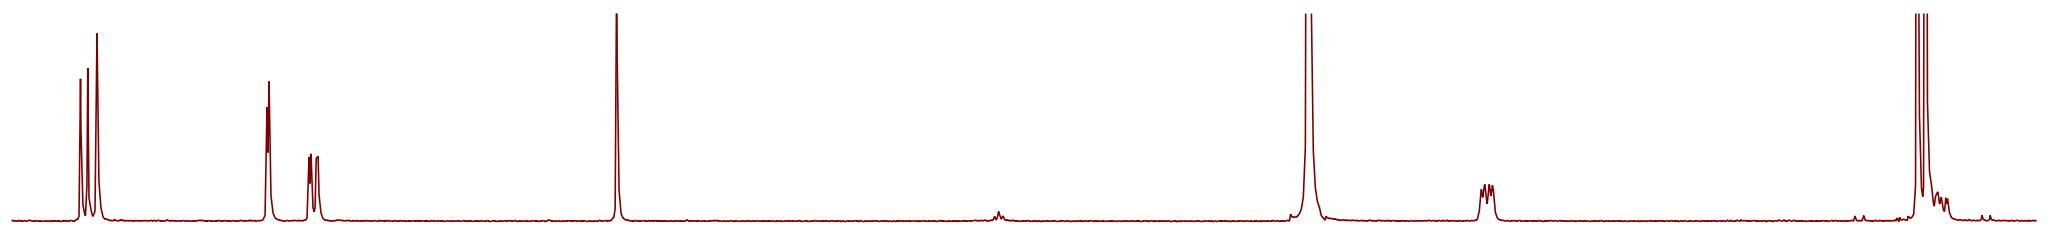

20150324\_vnmrs-700-20150324\_D700\_NMRLQ-V5527-FAC\_tembetarine\_JM\_DCB-gHMBCAD\_01

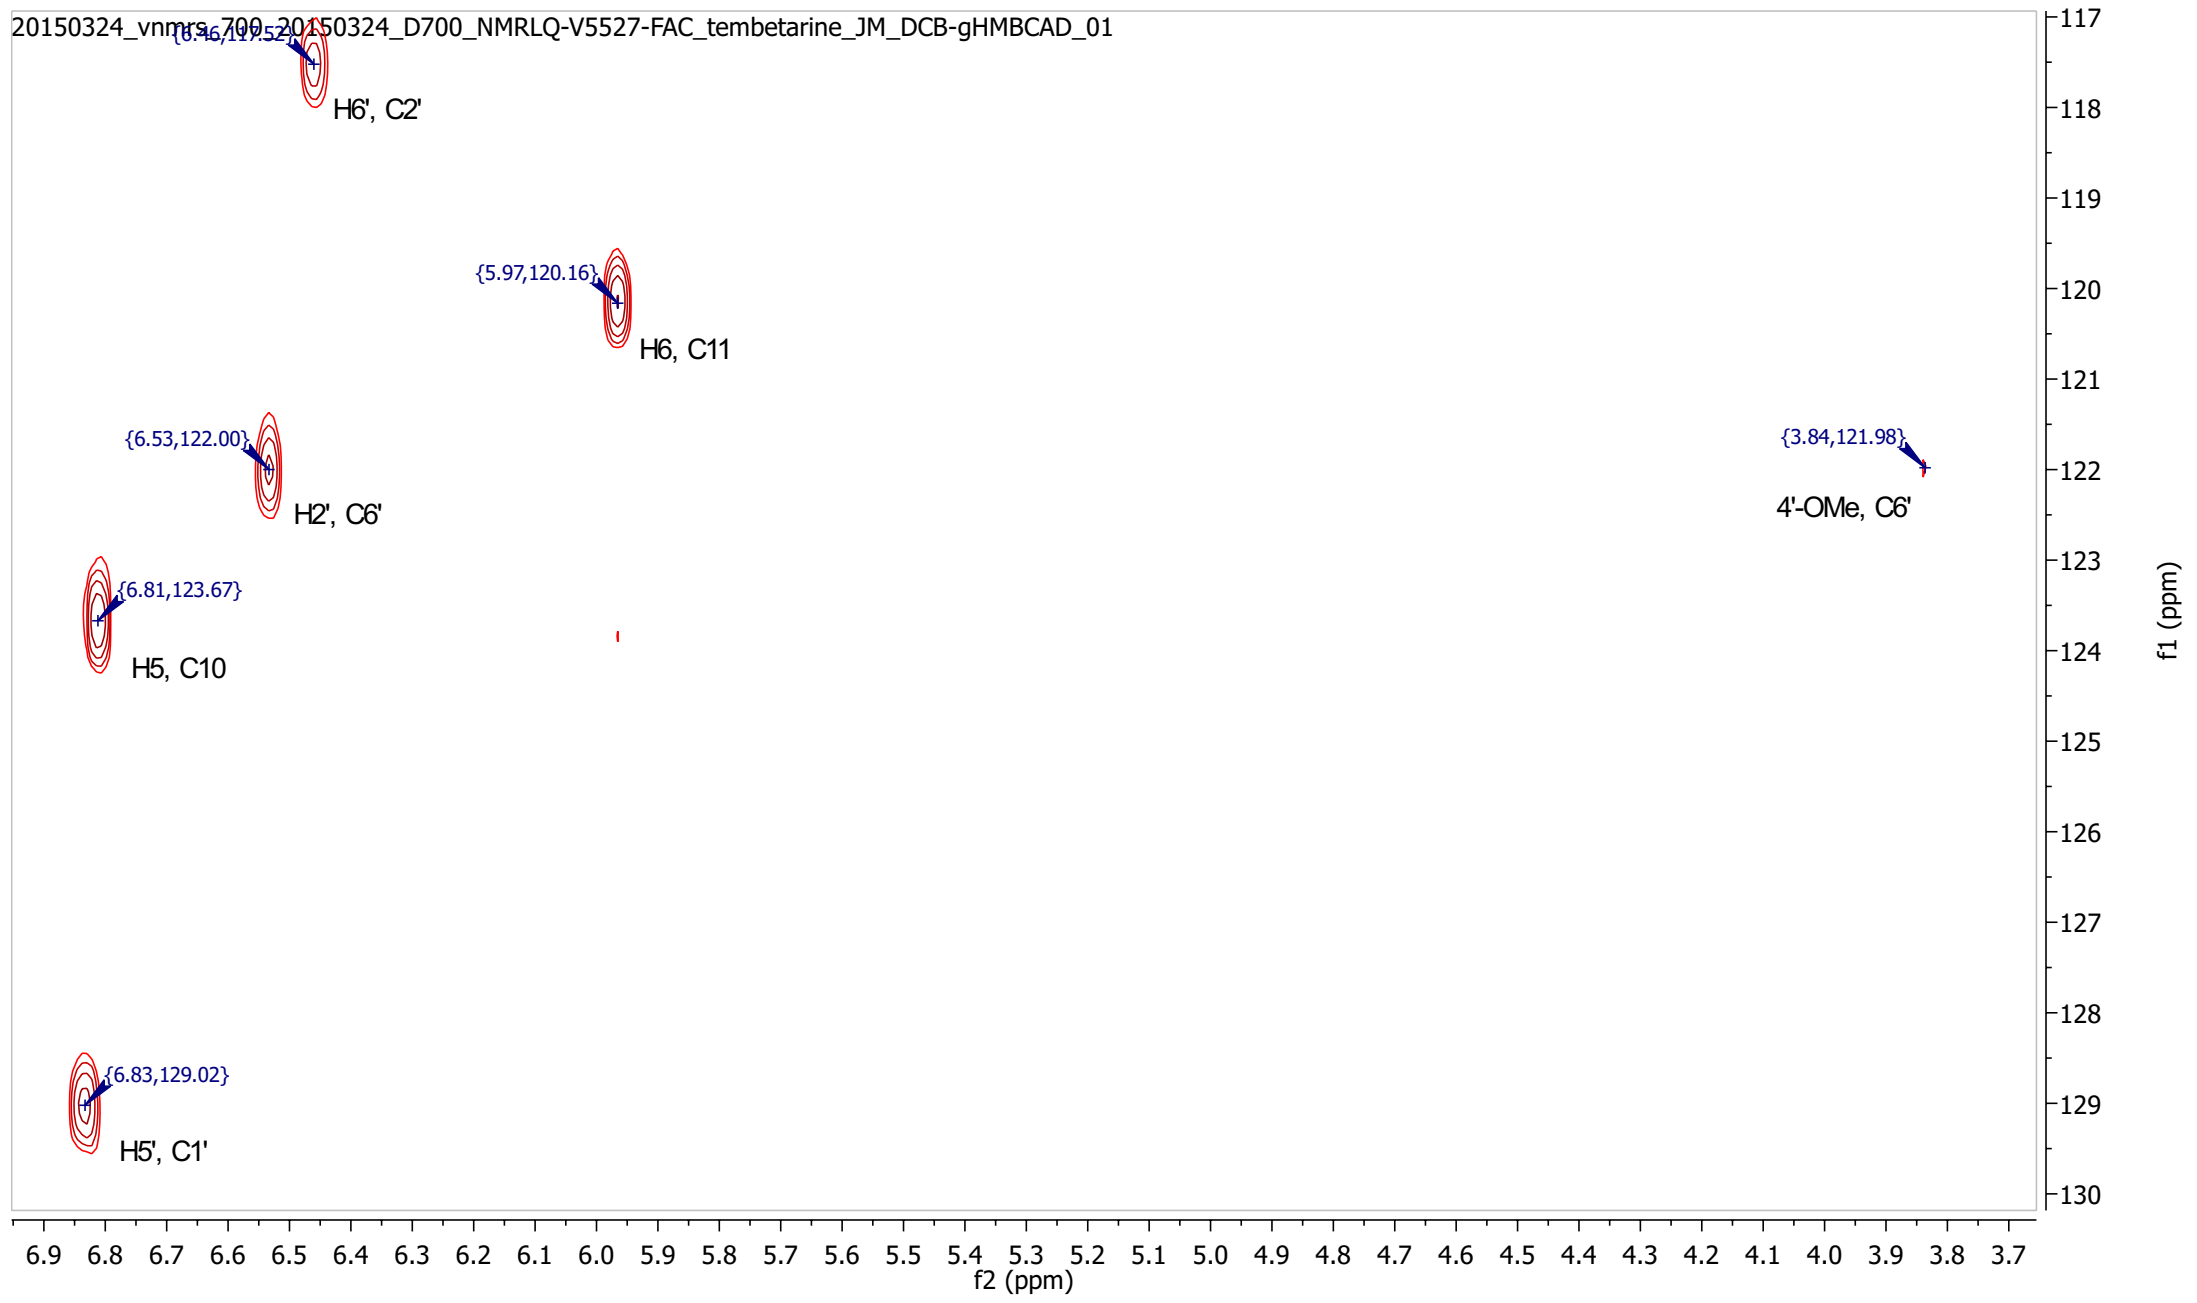

20150324\_vnmrs\_700\_20150324\_D700\_NMRLQ-V5527-FAC\_tembetarine\_JM\_DCB-gHMBCAD\_01

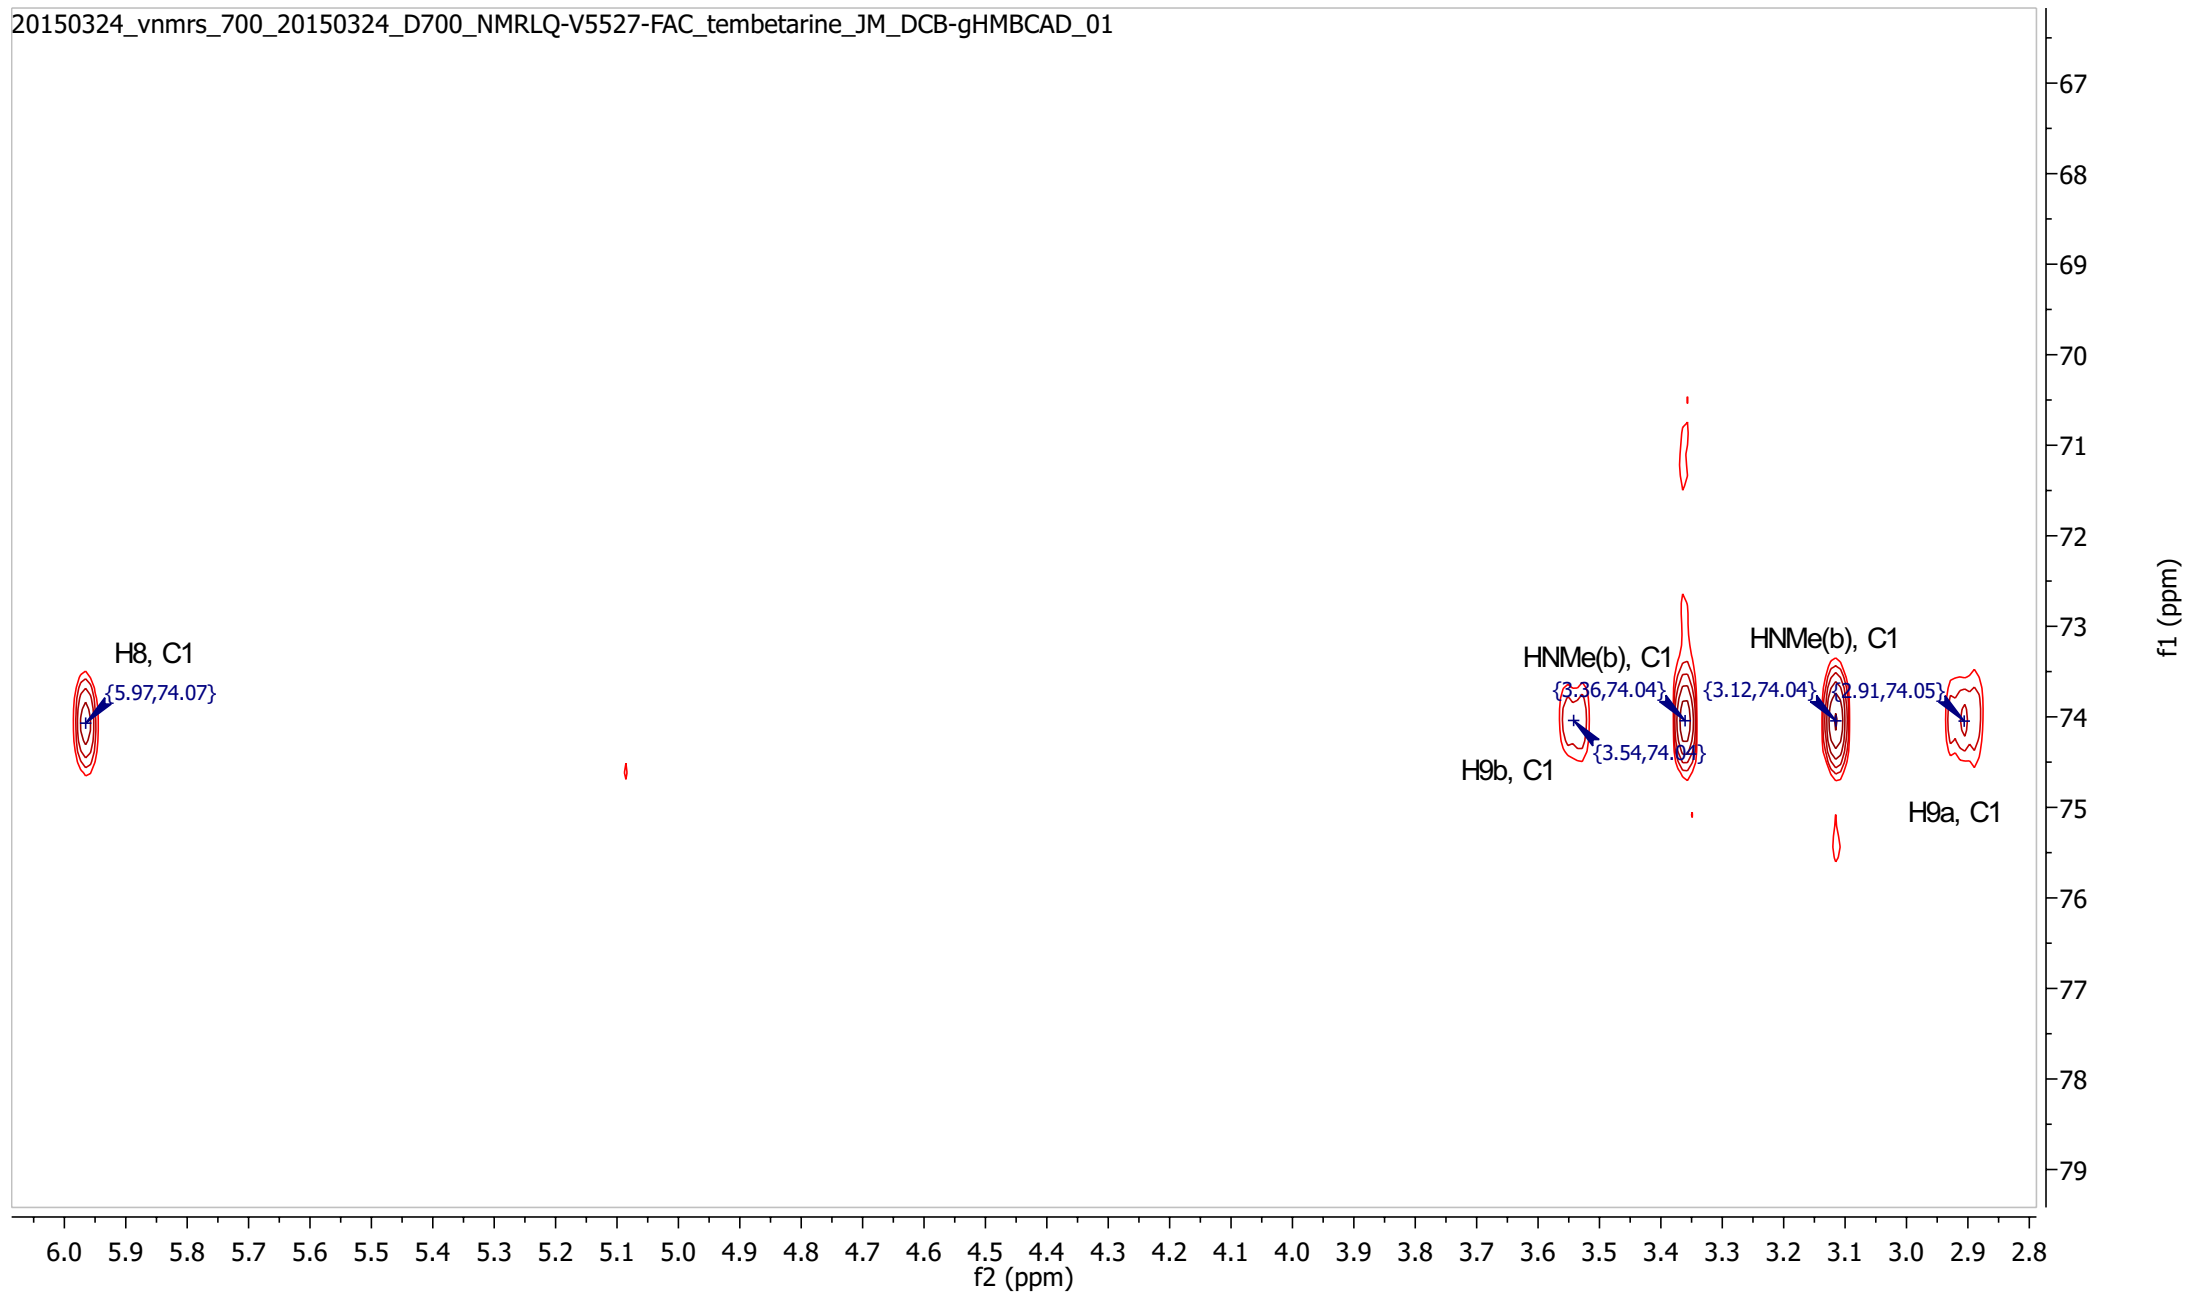

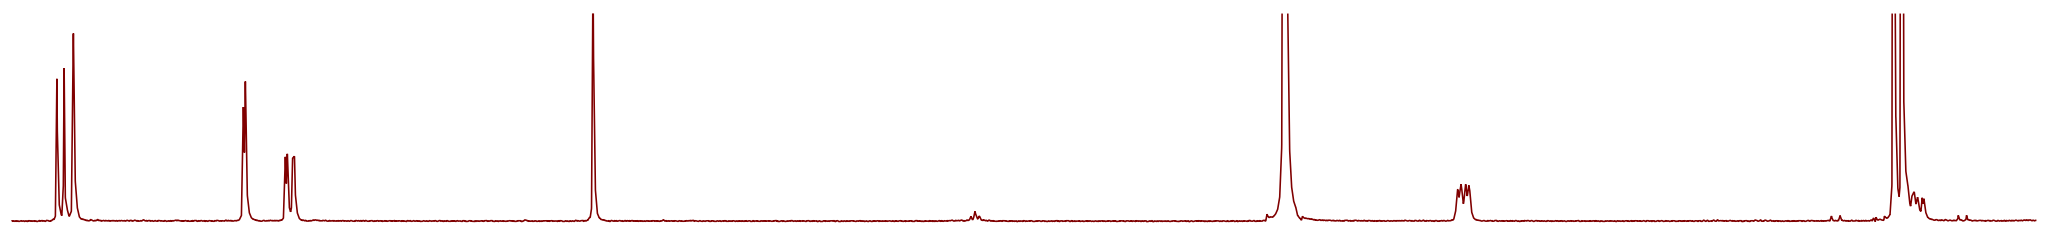

20150324\_vnmrs\_700\_20150324\_D700\_NMRLQ-V5527-FAC\_tembetarine\_JM\_DCB-gHMBCAD\_01

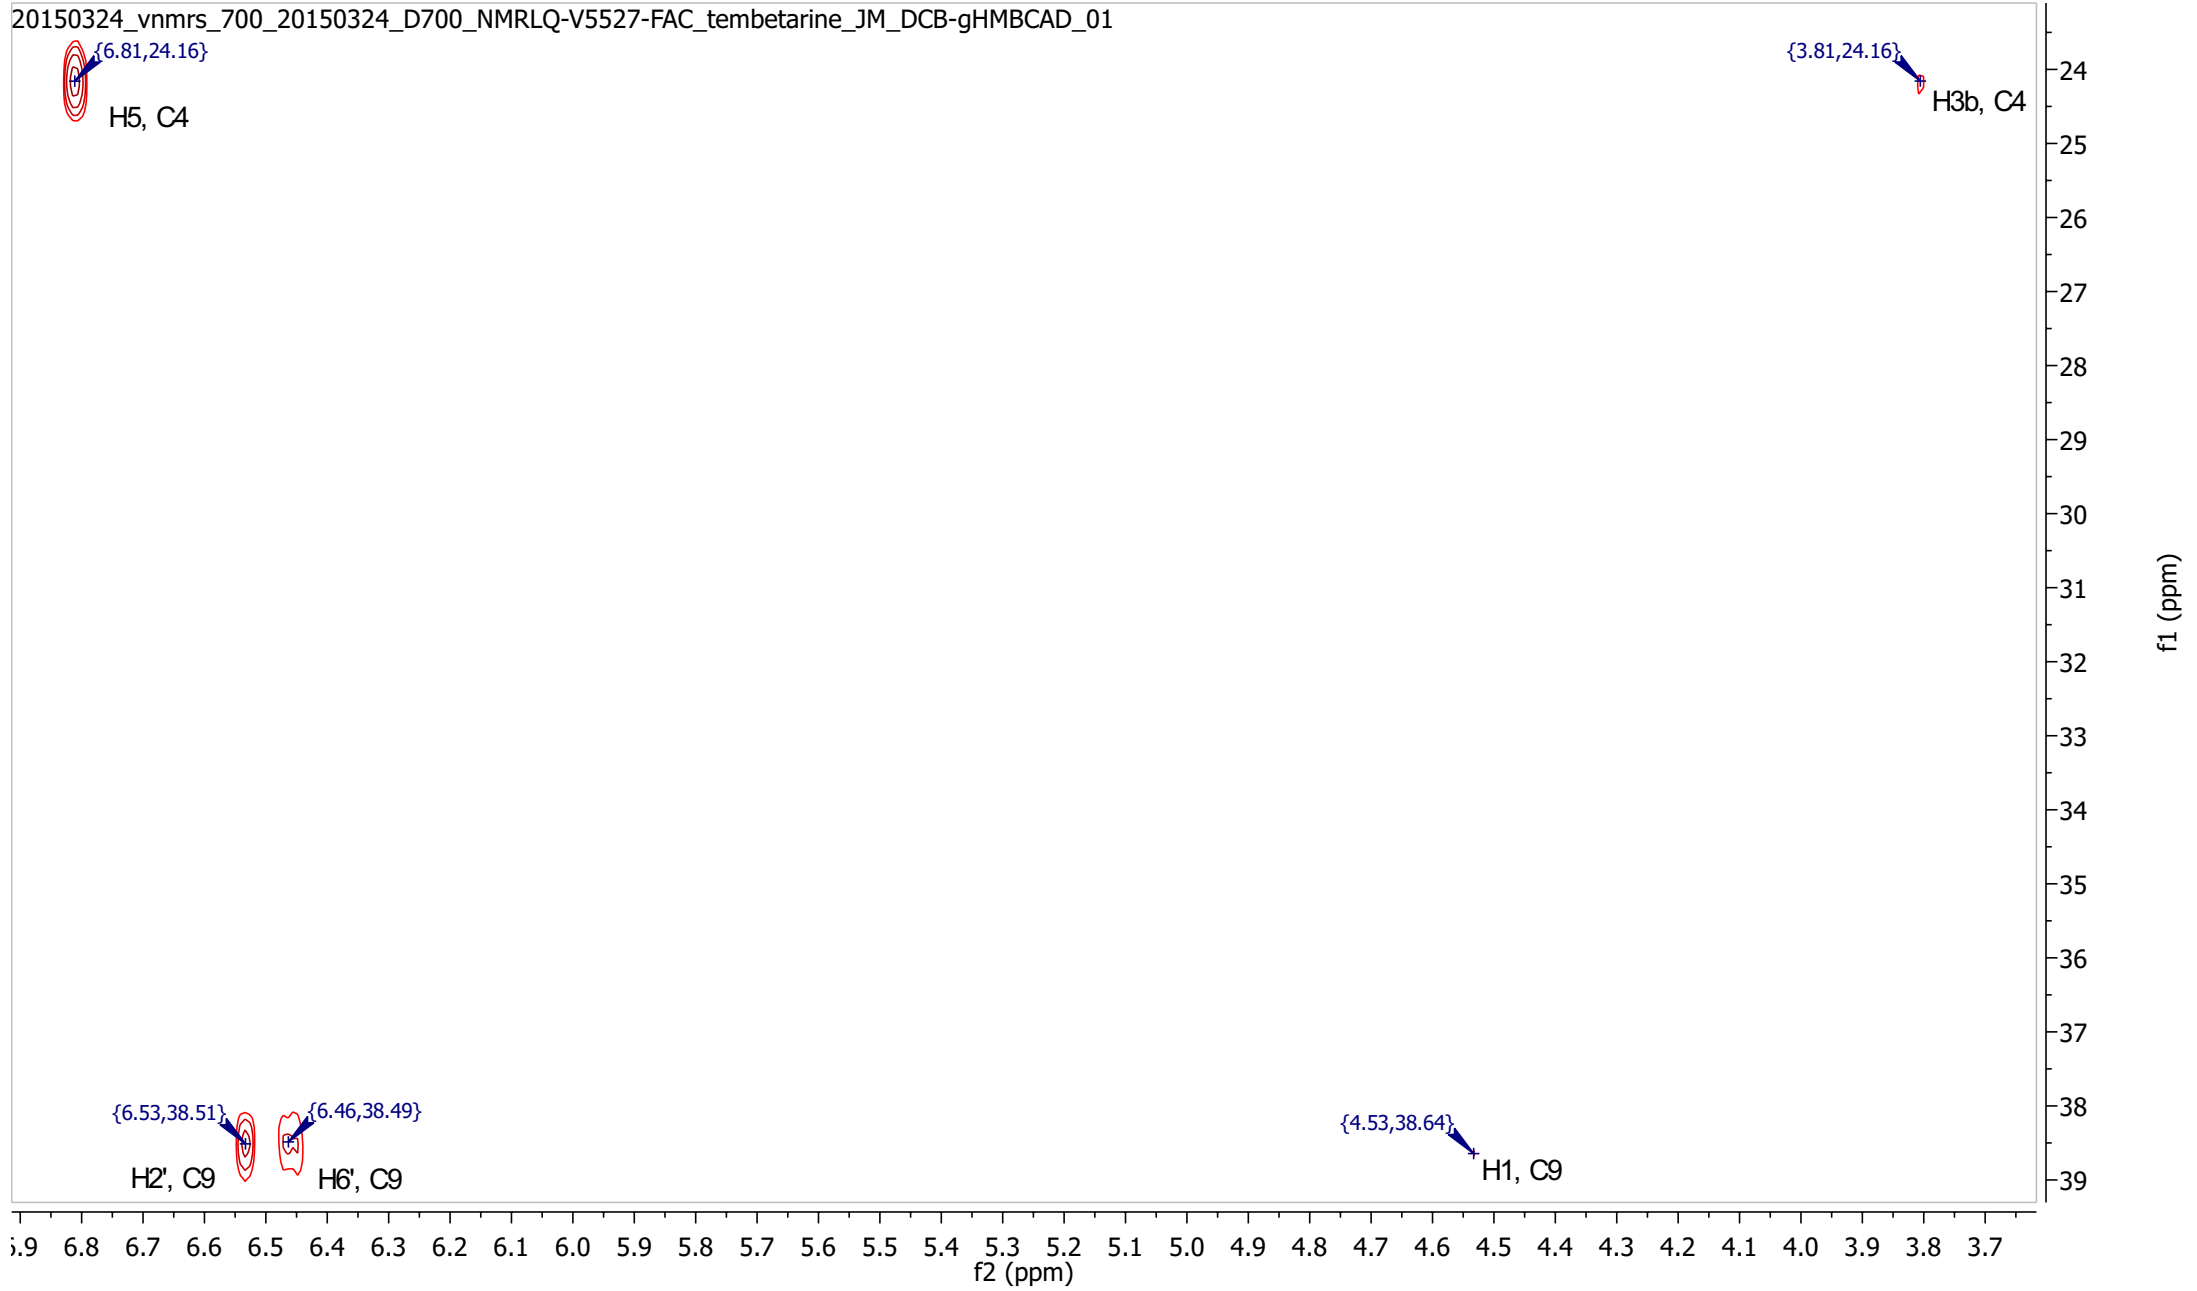

20150324\_vnmrs\_700\_20150324\_D700\_NMRLQ-V5527-FAC\_tembetarine\_JM\_DCB-gHMBCAD\_01

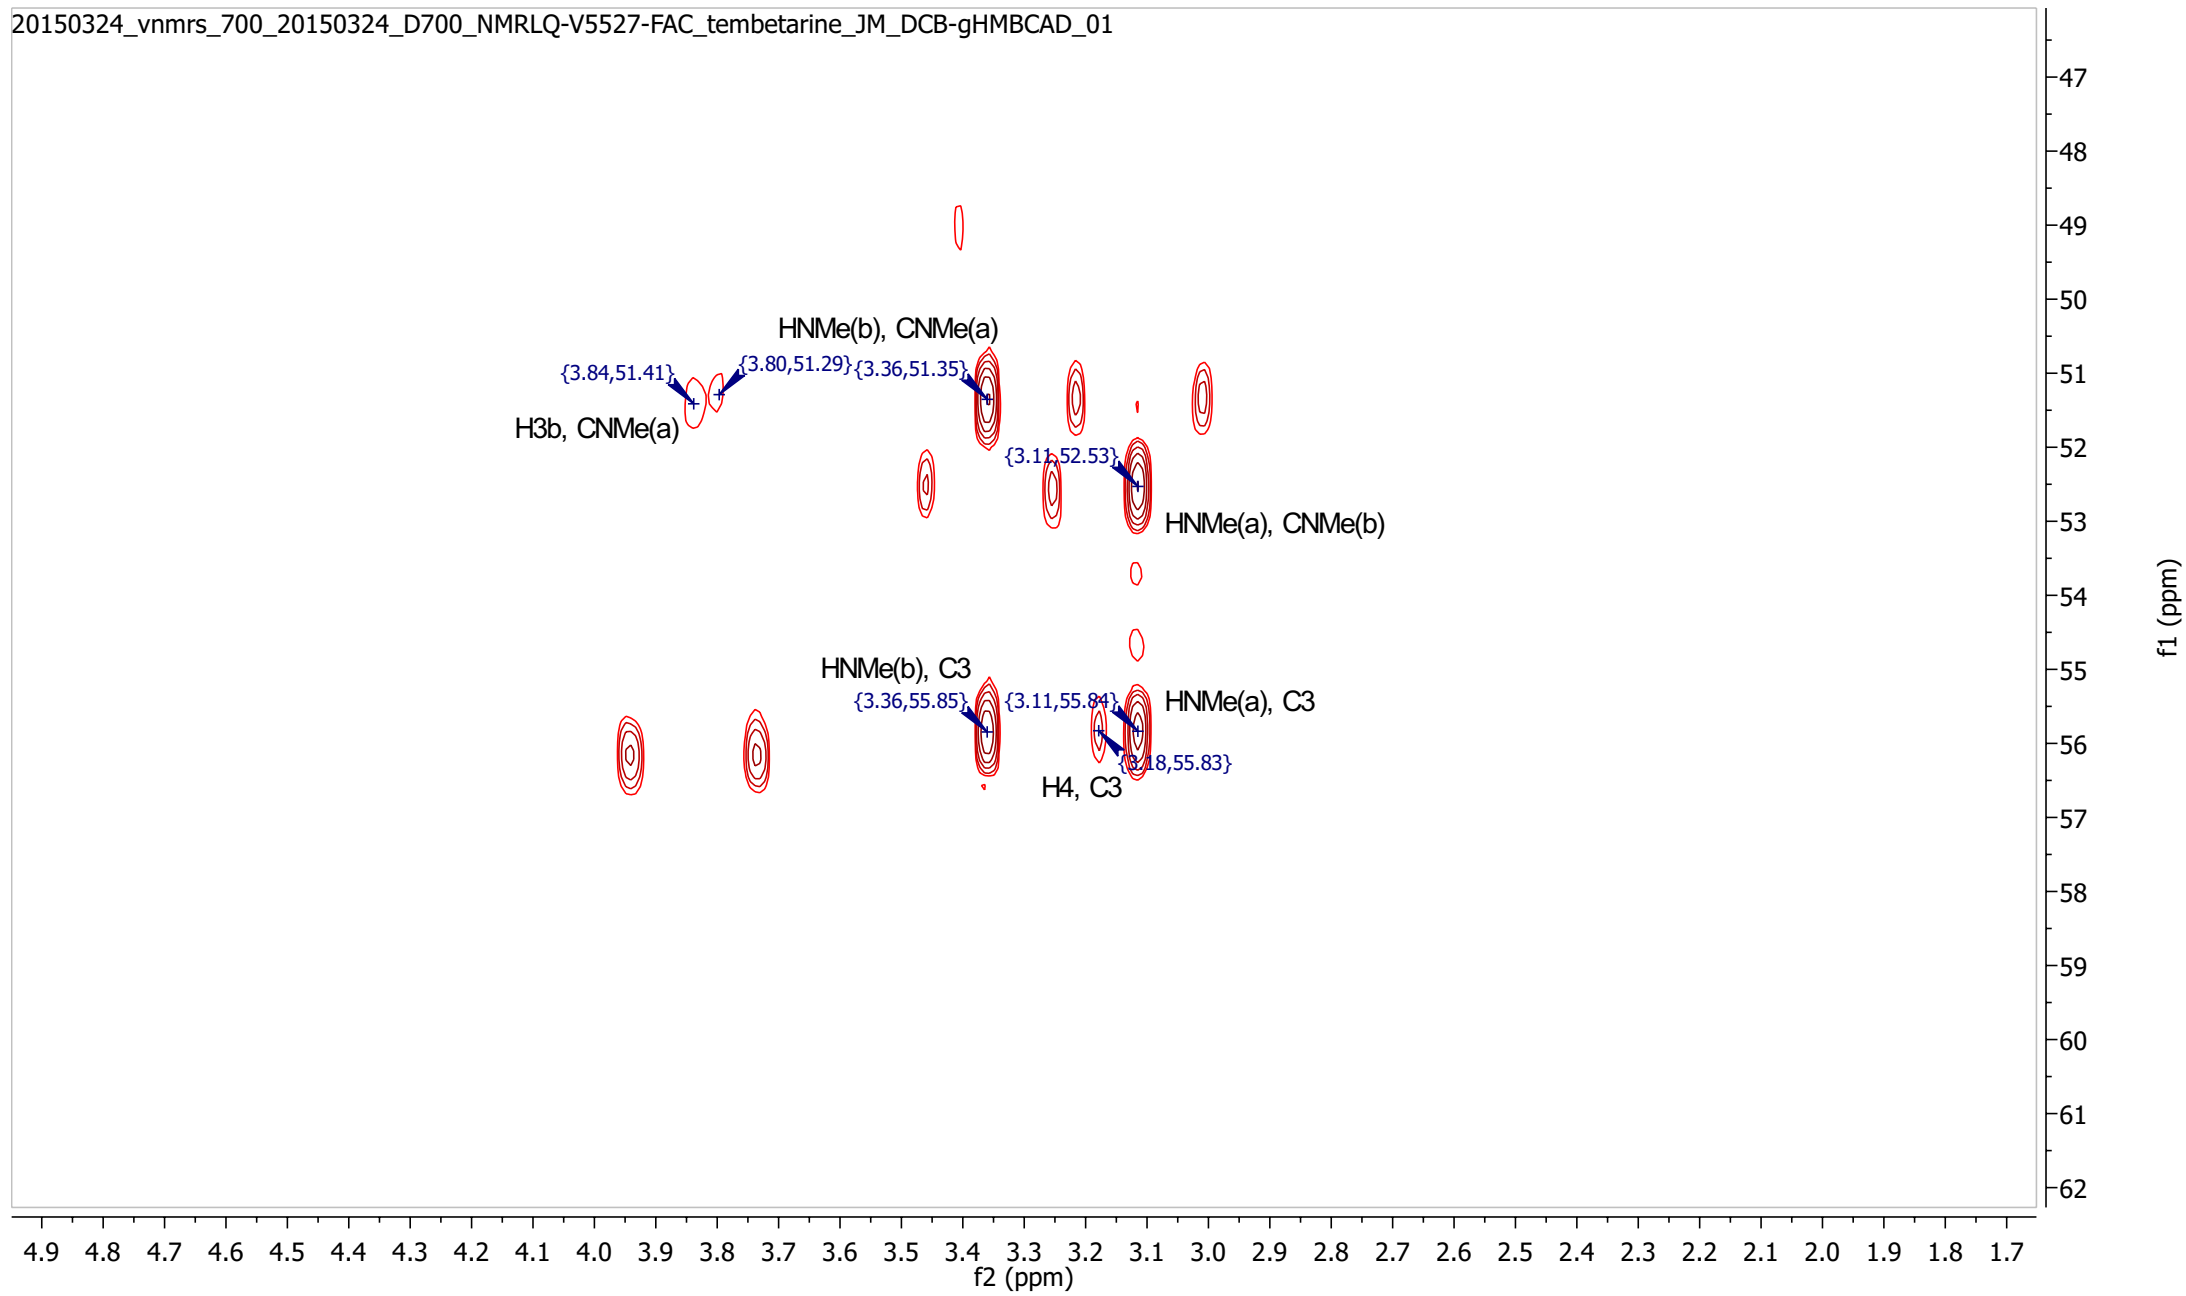

20150324\_vnmrs\_700\_20150324\_D700\_NMRLQ-V5527-FAC\_tembetarine\_JM\_DCB-gHMBCAD\_01

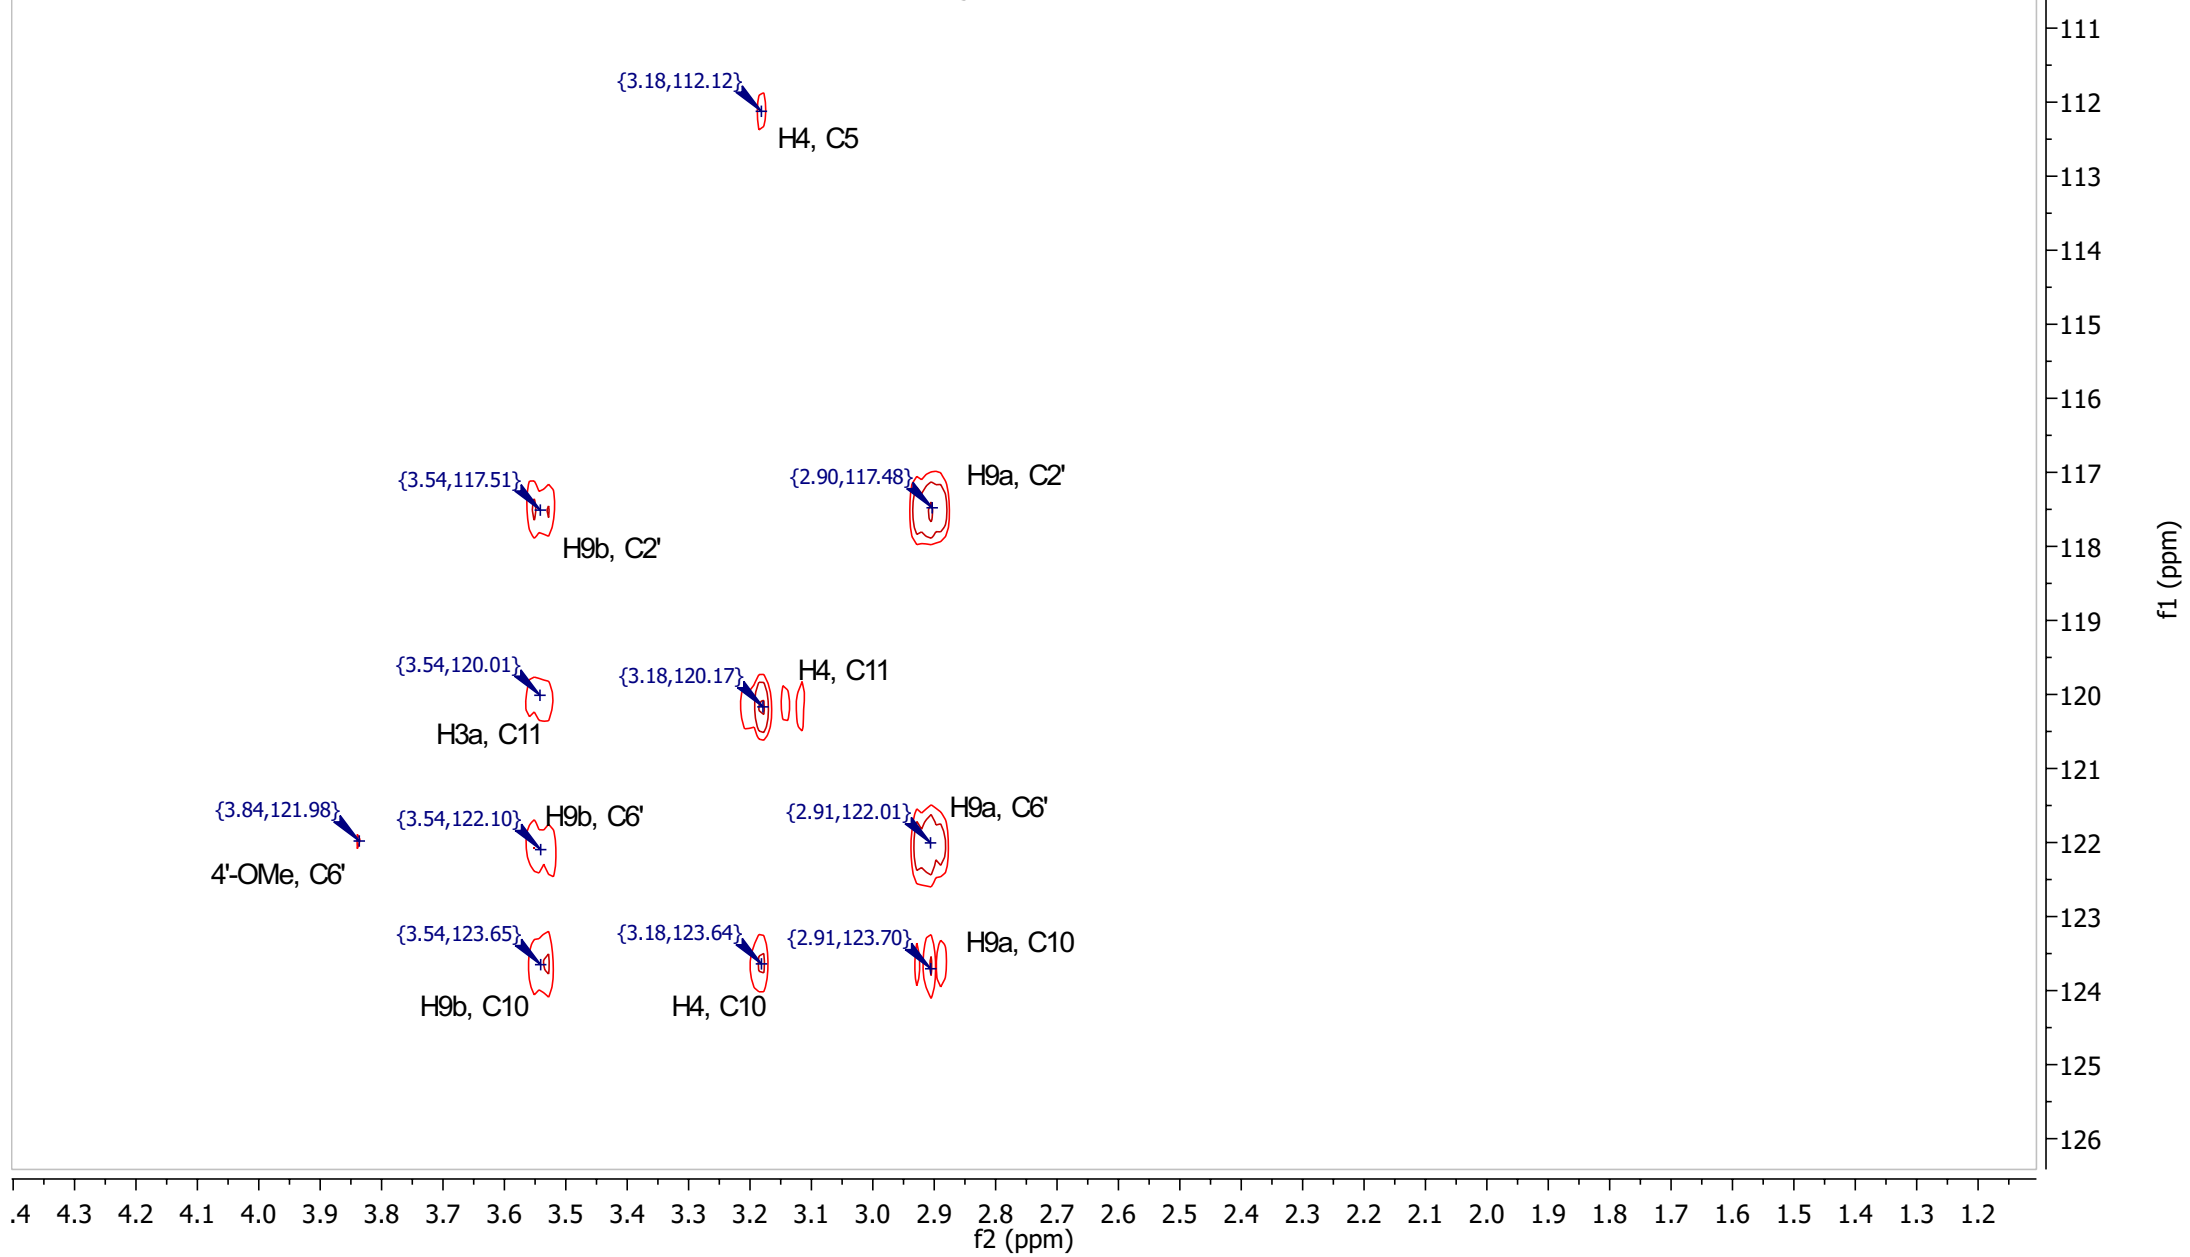

Supplement: 10.1074_M116.750893_jbc.M116.750893-1.pdf [file 10.1074_M116.750893_jbc.M116.750893-1.pdf]
