# Supplementary material
Source: PubMed Central journal article supplement (PMC5095398)

**Supplemental Figure 1.** Cobalt-affinity purification of recombinant His<sub>6</sub>-tagged RNMT (NMT3) and NMT4. SDS-PAGE analysis shows total *Escherichia coli* soluble protein extracts after induction, 20  $\mu$ L of a 20 mM imidazole wash, and the final purified protein fractions. The molecular weights of marker proteins are shown to the left of each gel image.

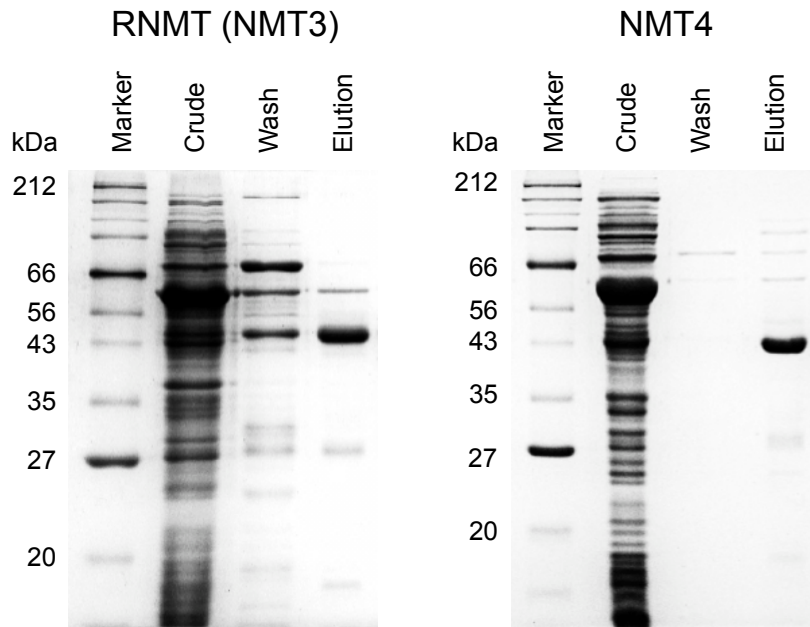

Supplement: 10.1074_M116.750893_jbc.M116.750893-2.pdf [file 10.1074_M116.750893_jbc.M116.750893-2.pdf]
