# Supplementary material
Source: PubMed Central journal article supplement (PMC5095398)

**Supplemental Figure 3.** Reverse transcription (RT)-PCR and transcript-metabolite correlation analysis of *RNMT*-silenced (pTRV2-RNMT) and control (pTRV2) plants. (A) Reverse transcription (RT)-PCR analysis of representative *RNMT*-silenced (pTRV2-RNMT) and control (pTRV2) plants. (B) Correlation between relative *RNMT* transcript level and accumulation of the *RNMT* substrate (corytuberine) and reaction product (magnoflorine) in *RNMT*-silenced (pTRV2-RNMT) and control (pTRV2) plants.

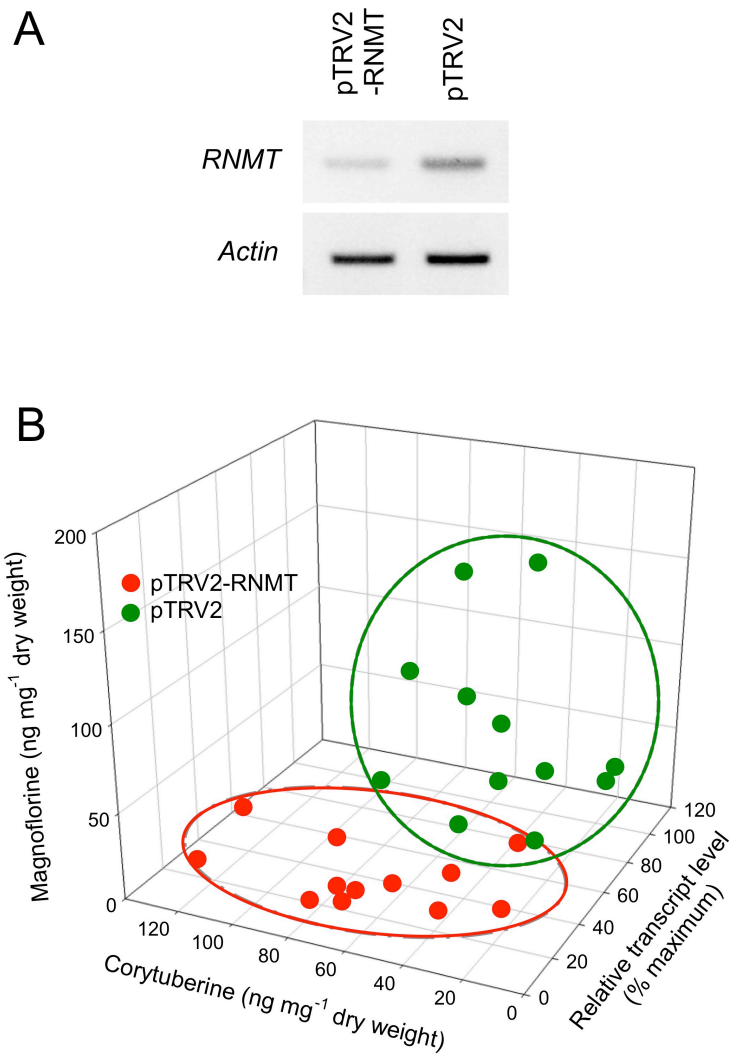

Supplement: 10.1074_M116.750893_jbc.M116.750893-4.pdf [file 10.1074_M116.750893_jbc.M116.750893-4.pdf]
