# Supplementary material
Source: PubMed Central journal article supplement (PMC5095398)

**Supplemental Figure 4.** Extracted ion chromatograms (EICs) for alkaloids identified in root alkaloid extracts from *RNMT*-silenced (pTRV2-RNMT) and control (pTRV2) plants.

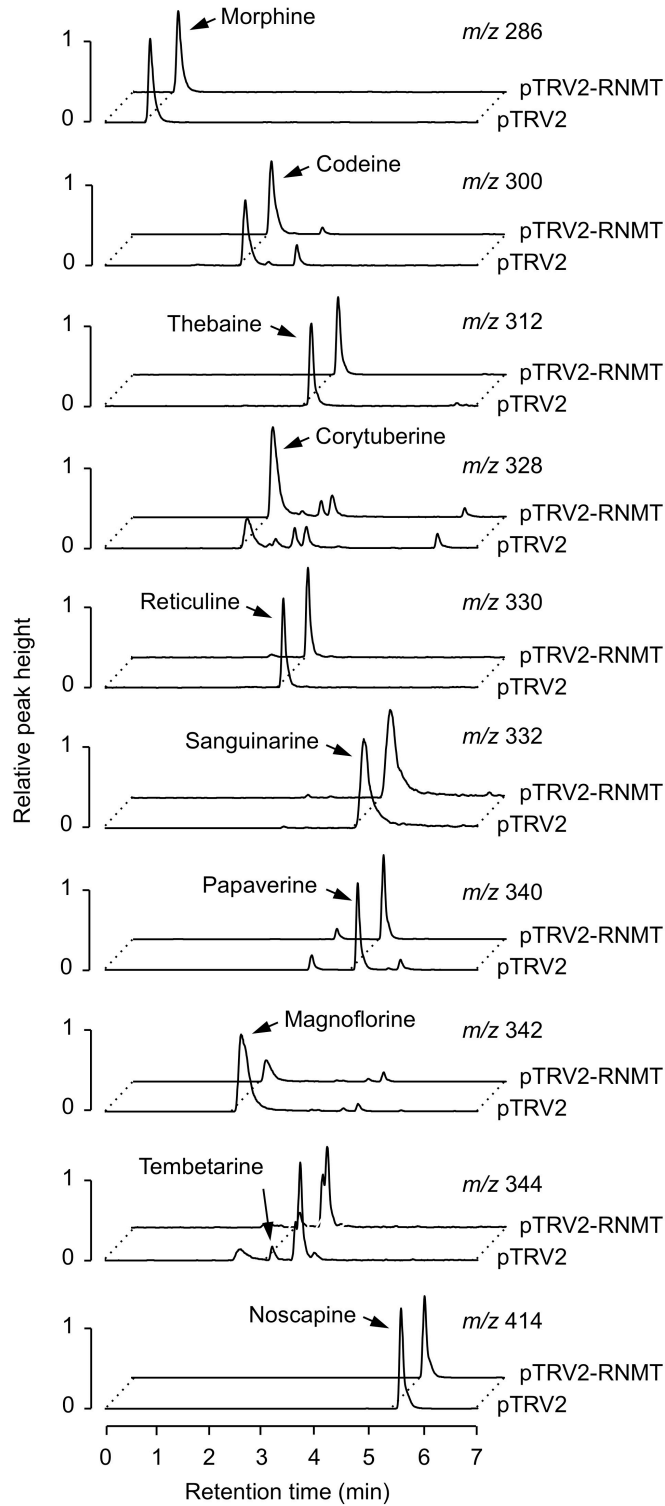

Supplement: 10.1074_M116.750893_jbc.M116.750893-5.pdf [file 10.1074_M116.750893_jbc.M116.750893-5.pdf]
