# Supplementary material
Source: PubMed Central journal article supplement (PMC5095398)
Supplement: 10.1074_M116.750893_jbc.M116.750893-6.pdf [file 10.1074_M116.750893_jbc.M116.750893-6.pdf]

**Supplemental Table 1.** Summary of NMR data for tembetarine.

| C number        | $\delta$ ( $^{13}\text{C}$ ) (ppm) | $\delta$ ( $^1\text{H}$ ) ppm | INT  | m  | J (Hz)    | gCOSY                    | HSQC ( $\text{H}\rightarrow\text{C}$ ) (ppm) | HSQC (m) / RING ID | HMBC ( $\text{H}\rightarrow\text{C}$ ) (ppm) |
|-----------------|------------------------------------|-------------------------------|------|----|-----------|--------------------------|----------------------------------------------|--------------------|----------------------------------------------|
| 1               | 74.04                              | 4.55                          | 1.00 | dd | 9.2, 4.0  | H9 $\alpha$ , H9 $\beta$ | 74.04                                        | CH/CH <sub>3</sub> | C9 (vw)                                      |
| 3 $\alpha$      | 55.79                              | 3.54                          | 1.00 | m  | -         | H3 $\beta$ , H4          | 55.79                                        | CH <sub>2</sub>    | C11 (w)                                      |
| 3 $\beta$       | 55.79                              | 3.82                          | 1.00 | m  | -         | H3 $\alpha$ , H4         | 55.79                                        | CH <sub>2</sub>    | C4 (vw), NMe( $\beta$ ) (w)                  |
| 4               | 24.16                              | 3.17                          | 2.00 | m  | -         | H3 $\alpha$ , H3 $\beta$ | 24.16                                        | CH <sub>2</sub>    | C3 (w), C5 (w), C10 (w), C11 (w)             |
| 5               | 112.10                             | 6.81                          | 1.00 | s  | -         | -                        | 112.10                                       | CH/CH <sub>3</sub> | C4 (s), C7 (s), C8 (m), C10 (s)              |
| 6               | 149.60                             | -                             | -    | -  | -         | -                        | -                                            | -                  | C11 (s)                                      |
| 6-OMe           | 56.14                              | 3.85                          | 3.00 | s  | -         | -                        | 56.14                                        | CH/CH <sub>3</sub> | C6 (vs)                                      |
| 7-OH            | 146.17                             | -                             | -    | -  | -         | -                        | -                                            | -                  | -                                            |
| 8               | 115.93                             | 5.96                          | 1.00 | s  | -         | -                        | 115.93                                       | CH/CH <sub>3</sub> | C1 (s), C6 (s), C7 (s)                       |
| 9 $\alpha$      | 38.51                              | 2.91                          | 1.00 | dd | 13.6, 9.2 | H1, H9 $\beta$           | 38.51                                        | CH <sub>2</sub>    | C1 (m), C2' (w), C6' (w), C10 (w)            |
| 9 $\beta$       | 38.51                              | 3.54                          | 1.00 | m  | -         | H1, H9 $\alpha$          | 38.51                                        | CH <sub>2</sub>    | C1 (w), C2' (w), C6' (w), C10 (w)            |
| 10              | 123.67                             | -                             | -    | -  | -         | -                        | -                                            | -                  | -                                            |
| 11              | 120.16                             | -                             | -    | -  | -         | -                        | -                                            | -                  | -                                            |
| 1'              | 129.02                             | -                             | -    | -  | -         | -                        | -                                            | -                  | -                                            |
| 2'              | 117.51                             | 6.53                          | 1.00 | d  | 2.20      | H6'                      | 117.51                                       | CH/CH <sub>3</sub> | C3' (m), C4' (s), C6' (s), C9 (m)            |
| 3'-OH           | 147.71                             | -                             | -    | -  | -         | -                        | -                                            | -                  | -                                            |
| 4'              | 148.24                             | -                             | -    | -  | -         | -                        | -                                            | -                  | -                                            |
| 4'-OMe          | 56.14                              | 3.83                          | 3.00 | s  | -         | -                        | 56.14                                        | CH/CH <sub>3</sub> | C4' (vs), C6' (vw)                           |
| 5'              | 112.55                             | 6.83                          | 1.00 | d  | 8.20      | H6'                      | 112.55                                       | CH/CH <sub>3</sub> | C1' (s), C3' (s), C4' (m)                    |
| 6'              | 122.00                             | 6.46                          | 1.00 | dd | 8.2, 2.2  | H5', H2'                 | 122.00                                       | CH/CH <sub>3</sub> | C2' (s), C4' (m), C9 (w)                     |
| NMe( $\alpha$ ) | 51.32                              | 3.11                          | 1.00 | s  | -         | HNMe( $\beta$ )          | 51.32                                        | CH/CH <sub>3</sub> | C1 (vs), C3 (s), NMe( $\beta$ ) (vs)         |
| NMe( $\beta$ )  | 52.50                              | 3.36                          | 1.00 | s  | -         | HNMe( $\alpha$ )         | 52.50                                        | CH/CH <sub>3</sub> | C1 (vs), C3 (s), NMe( $\alpha$ ) (vs)        |
