# Supplementary material
Source: PubMed Central journal article supplement (PMC5095398)
Supplement: 10.1074_M116.750893_jbc.M116.750893-7.pdf [file 10.1074_M116.750893_jbc.M116.750893-7.pdf]

**Supplemental Table 2.** Chromatographic and mass spectral data for authentic benzyloisoquinoline alkaloid standards.

| Compound     | [M+H] <sup>+</sup><br>or<br>[M] <sup>+</sup> | RT (min) | CE (eV) | ESI-CID spectrum<br><i>m/z</i> (relative intensity)                                                                                                                                                                                                     | Reference          |
|--------------|----------------------------------------------|----------|---------|---------------------------------------------------------------------------------------------------------------------------------------------------------------------------------------------------------------------------------------------------------|--------------------|
| Reticuline   | 330                                          | 3.29     | 25      | 330 (1), 299 (2), 267 (3), 239 (3), 235 (2), 227 (2), 207 (3), 192 (100), 179 (2), 178 (1), 177 (8), 175 (22), 163 (1), 160 (2), 151 (5), 149 (1), 143 (25), 137 (42), 119 (1), 115 (3), 44 (3)                                                         | Authentic standard |
| Tembetarine  | 344                                          | 3.16     | 25      | 344 (11), 299 (4), 267 (2), 241 (2), 239 (2), 235 (1), 209 (1), 207 (3), 193 (2), 192 (5), 179 (2), 177 (2), 175 (28), 173 (1), 160 (2), 151 (15), 145 (2), 143 (25), 137 (44), 114 (1), 58 (100)                                                       | Authentic standard |
| Corytuberine | 328                                          | 2.61     | 25      | 328 (2), 297 (26), 282 (37), 265 (100), 250 (5), 237 (30), 236 (5), 233 (9), 222 (22), 219 (17), 209 (15), 207 (8), 191 (14), 181 (7)                                                                                                                   | Authentic standard |
| Magnoflorine | 342                                          | 2.49     | 25      | 342 (11), 297 (56), 284 (4), 282 (25), 266 (1), 265 (72), 237 (18), 218 (4), 250 (3), 191 (4), 58 (100)                                                                                                                                                 | Farrow et al. 2012 |
| Morphine     | 286                                          | 0.80     | 25      | 286 (100), 268 (4), 229 (3), 227 (3), 211 (11), 209 (8), 201 (20), 199 (5), 193 (6), 191 (4), 185 (11), 183 (8), 181 (5), 181 (6), 173 (11), 165 (6), 165 (8), 157 (9), 155 (11), 153 (3), 153 (2), 147 (6), 145 (6), 58 (12), 55 (2), 44 (5)           | Authentic standard |
| Codeine      | 300                                          | 2.39     | 25      | 300 (100), 251 (3), 243 (5), 243 (5), 225 (10), 225 (5), 215 (35), 213 (5), 208 (3), 199 (14), 194 (4), 193 (3), 187 (15), 185 (8), 183 (15), 183 (8), 178 (3), 171 (4), 165 (15), 161 (6), 155 (4), 155 (6), 153 (3), 137 (5), 58 (16), 45 (3), 44 (5) | Authentic standard |
| Thebaine     | 3.55                                         | 3.55     | 25      | 312 (2), 281 (1), 266 (4), 251 (11), 249 (2), 239 (1), 234 (1), 223 (1), 221 (5), 218 (4), 205 (2), 195 (2), 191 (1), 177 (2), 58 (100), 56 (1), 44 (1)                                                                                                 | Authentic standard |
| Papaverine   | 340                                          | 4.45     | 25      | 340 (86), 325 (9), 324 (72), 310 (2), 308 (1), 296 (13), 203 (5), 202 (100), 187 (3), 175 (1), 171 (16), 123 (2)                                                                                                                                        | Authentic standard |
| Noscapine    | 414                                          | 5.26     | 25      | 414 (4), 365 (5), 353 (21), 323 (5), 220 (100), 206 (4), 179 (8)                                                                                                                                                                                        | Authentic standard |
| Sanguinarine | 332                                          | 4.82     | 25      | 332 (100), 330 (6), 317 (16), 304 (23), 302 (8), 274 (14)                                                                                                                                                                                               | Authentic standard |
